# Supplementary material
Source: PubMed Central journal article supplement (PMC10524702)
Supplement: NIHMS1903372-supplement-Supplementary_Material.pdf [file NIHMS1903372-supplement-Supplementary_Material.pdf]

## Supporting document

### **MATRISOME GENE-BASED SUBCLASSIFICATION OF PATIENTS WITH LIVER FIBROSIS IDENTIFIES CLINICAL AND MOLECULAR HETEROGENEITIES**

Wei Chen<sup>1, 2, 5, #</sup>, Yameng Sun<sup>3, 4, #</sup>, Shuyan Chen<sup>3, 4</sup>, Xiaodong Ge<sup>5</sup>, Wen Zhang<sup>3, 4</sup>, Ning Zhang<sup>3, 4</sup>, Xiaoning Wu<sup>3, 4</sup>, Zhuolun Song<sup>5</sup>, Hui Han<sup>5</sup>, Romain Desert<sup>5</sup>, Xuzhen Yan<sup>1, 2</sup>, Aiting Yang<sup>1, 2</sup>, Sukanta Das<sup>5</sup>, Dipti Athavale<sup>5</sup>, Natalia Nieto<sup>5, 6, \*</sup>, Hong You<sup>3, 4, \*</sup>

<sup>1</sup> Beijing Clinical Research Institute, No. 95 Yong'an Road, Xicheng District, Beijing 100050, China

<sup>2</sup> Experimental and Translational Research Center, Beijing Friendship Hospital, Capital Medical University, No. 95 Yong'an Road, Xicheng District, Beijing 100050, China

<sup>3</sup> Liver Research Center, Beijing Friendship Hospital, Capital Medical University, No. 95 Yong'an Road, Xicheng District, Beijing 100050, China

<sup>4</sup> Beijing Key Laboratory of Translational Medicine in Liver Cirrhosis, National Clinical Research Center of Digestive Diseases, No. 95 Yong'an Road, Xicheng District, Beijing 100050, China

<sup>5</sup> Department of Pathology, University of Illinois at Chicago, 840 S. Wood St., Suite 130 CSN, MC 847, Chicago, IL 60612, USA

<sup>6</sup> Department of Medicine, Division of Gastroenterology and Hepatology, University of Illinois at Chicago, 840 S. Wood St., Suite 1020N, MC 787, Chicago, IL 60612, USA

# These authors contributed equally.

#### **\*Corresponding Authors:**

Hong You, Liver Research Center, Beijing Friendship Hospital, Capital Medical University, No. 95 Yong'an Road, Xicheng District, Beijing 100050, China. E-mail: youhong30@sina.com. Phone: +86 (010) 6313-9019

Natalia Nieto, Department of Pathology, University of Illinois at Chicago, 840 S. Wood St., Suite 130 CSN, MC 847, Chicago, IL 60612, USA. E-mail: [nnieto@uic.edu](mailto:nnieto@uic.edu). Phone: +1 (312) 996-7316

**Financial support statement:** This work was supported by the National Natural Science Foundation of China (82170613 [to W.C.], 81970524 [to H.Y.], 82130018 [to H.Y.], 81800534 [to W.C.]), National Science and Technology Major Project (2018ZX10302204) (to H.Y.), Beijing Talent Fund (2018000021469G202) (to W.C.), and US National Institute of Diabetes and Digestive and Kidney Diseases (R01 DK111677) (to N. N.).

**Author's contributions:** Study design: H.Y., N.N., W.C.; project supervision: H.Y., N.N.; liver biopsy assessment and clinical data collection: Y.S., S.C., X.W., H.Y.; database search: W.C., R.D.; data analysis: W.C.; transcriptome sequencing: W.C., Y.S., S.C.; single-cell RNA sequencing: X.G., H.H., Z.S., R.D. S.D., D.A., N.N.; animal experiments: W.C., W.Z., N.Z., X.G., X.Y., A.Y.; manuscript writing: W.C.; critical revision of manuscript: N.N., H.Y., Y.S.; manuscript editing: all authors.

## **SUPPLEMENTARY MATERIAL AND METHODS**

### **Public transcriptomic datasets of liver fibrosis**

Publicly available gene expression profiles of human liver fibrosis were retrieved from Gene Expression Omnibus (GEO) using the search terms “fibrosis”, “cirrhosis”, “fibrotic” or “cirrhotic”. After manual retrieval, a total of 9 transcriptomic profiles comprising 892 subjects were used. These transcriptomic datasets were generated from frozen liver specimens or formalin-fixed and paraffin-embedded (FFPE) liver samples, with different etiologies (HBV, HCV, ALD, NASH). Detailed information of the datasets can be found in **Table S1**.

### **BJFSH cohort**

The BJFSH cohort contains 54 FFPE liver biopsies from 28 patients retrospectively obtained from our prospective HBV-related fibrosis/cirrhosis cohort studies (NCT01938781, NCT01938820). The patients were not coinfecting with HCV or human immunodeficiency virus, or diagnosed with any other chronic liver disease or severe systematic disorder. All patients were treatment-naïve (0W) when enrolled and then received continual antiviral therapy for 78 and/or 260 weeks (78W and/or 260W). Detailed information of antiviral therapy and timepoint of liver biopsy for each patient is included in **Table S2**. A total of 10 patients in the BJFSH cohort were biopsied at baseline and at 78 and 260 weeks of antiviral treatment. Demographic characteristics and clinical parameters of patients at baseline and at 78 and 260 weeks of antiviral treatment are in **Table S3**.

### **Liver fibrosis and resolution mouse models**

C57BL/6J mice (male, 8 weeks) were intraperitoneally injected with 12.5% of carbon tetrachloride (CCl<sub>4</sub>) (Innochem, Beijing, China) in mineral oil (1/7, v/v), at a dose of 0.01ml/g twice a week for 6 weeks (defined as ‘P6’); control mice received equal volume of mineral oil for 6 weeks (defined as ‘P0’). P6 mice subsequently underwent spontaneous recovery for 1, 3 or 6 weeks (defined as ‘R1’, ‘R3’, ‘R6’) after cessation of CCl<sub>4</sub> intoxication. All mice (n=5/group) were housed and bred in a pathogen-free

laboratory animal facility with appropriate temperature ( $23\pm 2^{\circ}\text{C}$ ), 12-hour light-dark cycle, and standard chow and water *ad libitum*.

### **Histological evaluation**

FFPE liver biopsies were sectioned into 5  $\mu\text{m}$  slices and stained with reticulin for standard histological assessment by two pathologists, who were blinded to the experimental conditions, time-point of the biopsy, or other clinical details. Discordant cases were reviewed again to achieve consensus. Liver fibrosis was assessed as regression when meeting one of the following criteria: 1) Ishak score decreased  $\geq 1$  after treatment; 2) Ishak score decreasing = 0 but post-treatment liver biopsy exhibited predominantly regressive changes according to the progressive, indeterminate and predominately regressive (PIR) scoring system (1). Mouse liver sections (4  $\mu\text{m}$ ) were stained with picrosirius red and 10 images with a 10x objective were randomly acquired from four liver lobes except the caudate lobe. Collagen proportionate area (CPA) was measured and averaged using Image-Pro Plus software (Version 6.0, Media Cybernetics, Rockville, MD).

### **Immunohistochemistry**

FFPE slides from human liver biopsies were dewaxed, rehydrated, antigen retrieved, blocked with goat serum, and incubated overnight at  $4^{\circ}\text{C}$  with a primary antibody against ACTA2 (dilution 1:250, ab5694, Abcam, Cambridge, UK), followed by incubation for 1 hour at room temperature with secondary antibody (PV-6001, ZSGB-BIO, Beijing, China). Pictures of immunostained ACTA2 were captured with a 3Dhistech Panoramic Scanner (3Dhistech, Budapest, Hungary).

### **Measurement of liver stiffness and serum biochemical parameters**

Liver stiffness was measured by transient elastography (Fibroscan, Echosens, France), which was considered reliable when the interquartile range-to-liver stiffness ratio was  $\leq 30\%$  in at least 10 valid measurements, and a success rate  $\geq 60\%$  was observed. Serum biochemical parameters including white blood cell (WBC), platelet (PLT),

alanine transaminase (ALT), aspartate aminotransferase (AST), alkaline phosphatase (ALP), glutamyl transpeptidase (GGT), albumin (ALB), total bilirubin (TBIL), and alpha fetoprotein (AFP) were measured according to standard protocols. Roche COBAS RTaqMan HBV test (Roche, Indianapolis, IN) based on real-time Taqman polymerase chain reaction assay (lower limit of quantification = 20 IU/mL), was used to measure serum HBV DNA levels.

### **Bulk RNA-seq of human FFPE liver tissues and data analysis**

Bulk RNA-seq of human FFPE liver tissues was carried out by Shanghai NextCODE Co., Ltd (Shanghai, China) as previously reported (2). Briefly, total RNA from paraffin blocks was extracted using Allprep RNA FFPE Kit (QIAGEN, Valencia, CA). The amount and quality of extracted RNA were determined by NanoDrop 2000 Spectrophotometer (Thermo Fisher, Wilmington, DE) and Agilent Bioanalyzer 2100 system (Agilent, Santa Clara, CA), respectively. All RNA samples have a DV200 (percentage of RNA fragments >200 nucleotides fragment distribution value)  $\geq 30\%$ . The TruSeq RNA Access Library Prep Kit (Illumina, San Diego, CA), optimized to provide reproducible results of RNA from FFPE samples, was used to prepare the cDNA library. Paired-end 150-bp sequencing of the libraries was performed on the Illumina NovaSeq platform (Illumina). Sequencing reads were trimmed by Trimmomatic (3) and aligned to the human reference genome hg19 by STAR RNA-seq aligner (4). Abundance of annotated genes was estimated by RSEM software (5).

### **Bulk RNA-seq of mouse frozen liver tissues and data analysis**

Total RNA of mouse frozen liver tissue was isolated using an RNA simple Total RNA kit (Tiangen, Beijing, China) per the manufacturer's protocol. RNA concentration and quality were measured using the same methods than in the RNA samples from human FFPE liver tissues. Next, Poly(A) mRNAs were enriched using magnetic oligo (dT) beads (Invitrogen, Carlsbad, CA), followed by RNA-seq library preparation using the NEBNext Ultra RNA Library Prep Kit (New England Biolabs, Hitchin, UK) according to the manufacturer's instructions. A 125 bp paired-end run was performed on the Illumina

HiSeq2500 platform at Biomarker Technologies Co., Ltd (Beijing, China). Clean reads were obtained by Perl script, and then mapped to the mouse reference genome GRCm38 using Bowtie2 (6) and HISAT (7) algorithms. Gene expression levels were measured using FPKM values by Cufflinks software (8).

### **Determination and definition of liver fibrosis-specific matrisome genes (LFMGs)**

The matrisome gene set previously analyzed (9) was also included in this study. GSE84044 (10), GSE14323 (11), GSE49541 (12), GSE103580 (13) and GSE130970 (14) were selected as derivation datasets for the identification of differentially expressed matrisome genes (DEMGs) between non-fibrotic (mild) and fibrotic (advanced) liver samples, since pathological diagnoses were determined based on liver biopsies and both non-fibrotic (mild) and fibrotic (advanced) samples were included. Gene expression levels detected by microarray were normalized using the robust multichip average algorithm (15), and DEMGs were analyzed using *Limma* (16) *R* package. Read counts from RNA sequencing (RNA-seq) data were scaled into fragments per kilobase per million (FPKM) or transcripts per million (TPM). DEMGs were analyzed using *edgeR* (17) *R* package. Adjusted  $p < 0.05$  and  $FC > 1.5$  were set as statistically significant criterion. Due to batch effect, platform diversity, or dissimilarity of tissue dissection, DEMGs overlapped among at least 4 out of the 5 datasets were analyzed using *UpSetR* (18) *R* package and defined as a LFMG signature.

### **Validation of the LFMG signature**

First, an independent dataset (GSE149601), containing 140 non-cirrhotic and 55 cirrhotic patients diagnosed by liver biopsy or Fibroscan  $> 12.5$  kPa, was chosen as validation dataset, to validate the expression of LFMGs using unpaired Student's *t* test. A  $p < 0.05$  and  $FC > 1.5$  were set as statistically significant criterion. The diagnostic ability of the LFMG signature as a combined signature in liver fibrosis was evaluated using unsupervised clustering methods including uniform manifold approximation and projection (UMAP) and hierarchical clustering (HCL) performed by *umap* and *heatmap* *R* packages, respectively.

Second, we used the GSE152329 (19) dataset with liver transcriptomic profiles from CCl<sub>4</sub>- or mineral oil-injected hybrid mouse diversity panel (HMDP) strains consisting of approximately 200 well-characterized inbred strains of mice (one mouse per strain) and the liver transcriptomic gene expression profile generated from our newly-built liver fibrosis and resolution mouse models (C57BL/6J genetic background) to evaluate the expression pattern of the LFMG signature. The significance of differential expression of LFMGs between CCl<sub>4</sub>- and mineral oil-injected mice was determined using unpaired Student's *t* test. A  $p < 0.05$  and FC  $> 1.5$  were considered statistically significant.

Third, we performed a cross-sectional comparison among different etiologies to illustrate whether the LFMG signature is independent of any etiology. The derivation datasets were separated into two groups: the first contained GSE84044 (HBV), GSE49541 (NASH) and GSE14323 (HCV); the second contained GSE130970 (NASH) and GSE149601 (HCV). Datasets from the two groups were generated by microarray and bulk RNA-seq, respectively. Gene expression profiles in each group were merged after normalization to the average level of each LFMG within one profile. Then, unsupervised clustering methods (UMAP and HCL) were performed, based on the LFMG signature expression level, to verify whether the LFMG signature could discriminate fibrotic and non-fibrotic samples with varying etiologies in the merged dataset.

Last, patients without fibrosis from GSE84044 (HBV), GSE130970 (NASH), GSE48452 (NASH) and GSE103580 (ALD) were used to analyze whether the LFMG signature expression was sensitive to the response to acute or chronic insult prior to fibrosis.

### **Functional specification of LFMGs**

The Search Tool for Retrieval of Interacting Genes (STRING, version 11.0) (20) was used to predict internal interactions of LFMGs with a default confidence score  $> 0.4$ ,

followed by visualization of the LFMG regulatory network using Cytoscape (21). Functional interpretation of the LFMGs was performed and visualized using the *ClusterProfiler* (22) R package, based on the Kyoto Encyclopedia of Genes and Genomes (KEGG) pathway database. An adjusted  $p < 0.05$  was set as the cutoff criterion for statistical significance, which was determined by Fisher's exact test followed by the Benjamini-Hochberg correction.

### **Soft clustering analysis of LFMGs**

Given that the GSE84044 and GSE130970 datasets included liver fibrosis patients with different pathological stages, as METAVIR scores ranged from F0 to F4, both datasets were used for soft clustering analysis, to assess the sustained increased or decreased expression patterns of LFMGs along with liver fibrogenesis. After the normalized LFMG expression level was averaged and  $\log_2$ -transformed among samples, soft clustering was implemented with the fuzzy c-means (FCM) clustering algorithm embedded in *Mfuzz* (23) R package with parameters  $c=8$  and  $m=1.25$ . The cluster number was determined once its increase would not add a new cluster but instead split a previous cluster into two.

### **Molecular subclassification of liver fibrosis patients**

Subclassification of liver fibrosis patients was carried out by the *heatmap* R package. HCL analysis with the average linkage method and "euclidean" or "canberra" as a distance metric was employed to subclassify, without supervision, liver fibrosis patients naïve to treatment, on anti-HBV therapy for 78 or 260 weeks, and HBV, HCV or NASH-related liver fibrosis patients from GSE84044, GSE130970, GSE193080, GSE193066 and GSE48452, and all patients with identical fibrosis stage from each of the aforementioned profiles, based on expression of the LFMG signature. Patients were subclassified as "LFMG<sup>High</sup>", when LFMGs relatively exhibited a fibrosis-biased expression pattern (higher expression), and as "LFMG<sup>Low</sup>", when LFMGs relatively exhibited a non-fibrosis-biased expression pattern (lower expression).



### **Gene set enrichment analysis (GSEA)**

GSEA was carried out with the c2 KEGG gene sets from the MSigDB as previously described (9) to interpret the biological functions of the identified LFMGs between LFMG<sup>Low</sup> and LFMG<sup>High</sup> patients, which was performed using the *gseKEGG* function from the *clusterProfiler* (22) R package. The number of permutations was set to 1,000 and a  $p < 0.05$  was considered as statistically significant. The normalized enrichment score (NES) is the enrichment score for the gene set after normalization of the analyzed gene sets; a positive NES indicates correlation with the first group and a negative NES indicates correlation with the second group.

### **Estimation of tissue infiltrating immune cells and stromal cells**

The *MCPcounter* (24) R package is designed to recapitulate inter-sample stromal and immune cell populations based on highly specific transcriptomic markers. We used this method to quantify and compare immune cell infiltration or stromal cells, including fibroblasts, endothelial cells, monocytic lineage, neutrophils, lymphocytes (CD8<sup>+</sup>, T, B, NK or cytotoxic lymphocytes) and myeloid dendritic cells between LFMG<sup>Low</sup> and LFMG<sup>High</sup> patients. We systematically compared liver infiltrating immune cell and stromal cell populations between LFMG<sup>Low</sup> and LFMG<sup>High</sup> patients with or without equal fibrosis stage. The summary effect size for each cell population was estimated using an inverse variance model as previously reported (25), which was done and visualized using Review Manager 5.4 software. The difference between LFMG<sup>Low</sup> and LFMG<sup>High</sup> patients was recognized as statistically significant when the  $p$  value in the meta-analysis was  $< 0.05$ .

### **In vivo isolation of mouse liver nonparenchymal cells (NPCs)**

Mouse liver NPCs were isolated from mineral oil-injected control, CCl<sub>4</sub>-injected (peak fibrosis) and fibrosis resolution (1 week recovery from CCl<sub>4</sub>) as previously described with minor modifications (26). Liver cell suspensions were obtained by ETGA buffer perfusion and subsequent collagenase D (0.08 U/ml, Roche, Indianapolis, IN) perfusion for 15 min (3 ml/min) via the inferior vena cava (IVC). To obtain a single-cell

NPC suspension, livers were explanted into a sterile Petri dish and further digested with Pronase E (0.5 mg/ml, Millipore Sigma, Burlington, MA) and DNase-I (2%, Roche, Indianapolis, IN) for 25 min at 37°C and spun down at 50g for 3 min to remove hepatocytes. Isolated NPCs were purified by density gradient with Percoll (GE Healthcare, Chicago, IL) at 35% and 70%. Supernatants were pelleted at 400g for 3 min and resuspended in cold fluorescence-activated cell sorting (FACS) buffer. Propidium Iodide (Biolegend, San Diego, CA) was added and sorting was performed to isolate single NPCs from debris, doublets and dead cells.

### **Sample preparation and cDNA library construction for single cell RNA sequencing (scRNA-seq)**

Cell samples were handled strictly per the protocol of 10x Genomics Single Cell 3, Reagent Kits v3 (10x Genomics, Pleasanton, CA) as previously reported (27). In brief, sorted live NPCs from the mineral oil, peak and resolution groups were pelleted and resuspend to a concentration of 1000 cells/μl. The percentage of viable cells in each sample was greater than 80 by Trypan blue (Gibco, Waltham, MA) staining and automated cell counts. Single-cell barcoded cDNA was synthesized by reverse transcription using RT Master Mix (10x Genomics) and 10x Genomics Single Cell B Chip, followed by PCR amplification, to yield sufficient mass for library construction. Enzymatic fragmentation and size selection including end-repair, A-tailing, adaptor-ligation, and sample indexing PCR were used to optimize the cDNA amplicon size and produce Illumina-ready sequencing libraries.

### **ScRNA-seq and data analysis**

Sequencing was run on the HiSeq 4000 system (Illumina) at University of Illinois at Urbana-Champaign DNA Sequencing Laboratory. Cell Ranger (10x Genomics, version 3.1.0) was used for sample demultiplexing, alignment (reference genome, mm10), filtering, and gene-level unique molecular identifier (UMI) counting. *Seurat v.3* (28) was used to perform downstream analysis filtering the expression matrices to ensure high-quality scRNA-seq data: cells with fewer than 300 genes and greater than 5% of total

UMIs mapping to the mitochondrial genome were filtered; genes found in less than 10% of cells, housekeeping genes and mitochondrial genes were excluded; clusters with fewer cells were also excluded for downstream analysis. “LogNormalData” in *Seurat* v.3 was used to normalize the filtered gene-barcode matrix. Preliminary cell clustering was conducted based on principal component analysis (PCA)-reduced data for clustering analysis using *FindClusters* function in *Seurat* v.3 (parameter resolution was set to 0.8). Cell types of total cells were annotated to known biological types according to the known marker genes listed in **Table S10**. Annotated hepatic stellate cells (HSCs), infiltrating and resident macrophages, and endothelial cells (ECs) were further re-integrated and re-clustered by *Seurat* v.3 based on specific marker genes listed in **Table S10**. Cell clusters were visualized by UMAP plot. Expression of the LFMG signature in all NPCs from mineral oil, peak and resolution were visualized by the *ComplexHeatmap* (29) *R* package. The *FindMarkers* function in *Seurat* v.3 was used to determine differentially expressed genes (DEGs) with thresholds of  $p < 0.05$  and  $FC > 2$ . KEGG pathway enrichment analysis of top 1,000 genes with the highest abundance was conducted using the *ClusterProfiler* (22) *R* package. Moreover, a publicly available human scRNA-seq data (GSE136103) generated from 6 healthy livers and 4 cirrhotic livers (CD45<sup>-</sup> cells) (30, 31) was used and explored strictly per the analysis pipeline of mouse scRNA-data, in order to verify whether the scRNA-seq results from CCl<sub>4</sub>-induced fibrosis in mice was comparable with patients with liver fibrosis.

### **Cell type deconvolution using BayesPrism**

We used *BayesPrism*, a newly developed Bayesian model by Chu et al (32), to jointly infer the posterior distribution of cell type fractions from human bulk RNA-seq data using scRNA-seq (GSE136103) reference as prior information. Cell types of interest were deconvolved and compared between LFMG<sup>Low</sup> and LFMG<sup>High</sup> patients, with or without equal fibrosis stages. Specific *R* codes for cell type deconvolution using *BayesPrism* were included in the figshare platform (DOI: 10.6084/m9.figshare.22002707). Meta-analysis of cell type proportions between

LFMG<sup>Low</sup> and LFMG<sup>High</sup> patients with or without equal fibrosis stage was performed as mentioned above. A  $p < 0.05$  was considered as statistically significant.

---

## SUPPLEMENTARY REFERENCES

1. Sun Y, Zhou J, Wang L, Wu X, Chen Y, Piao H, Lu L, et al. New classification of liver biopsy assessment for fibrosis in chronic hepatitis B patients before and after treatment. *Hepatology* 2017;65:1438-1450.
2. Li R, Yang Z, Shao F, Cheng H, Wen Y, Sun S, Guo W, et al. Multi-omics profiling of primary small cell carcinoma of the esophagus reveals RB1 disruption and additional molecular subtypes. *Nat Commun* 2021;12:3785.
3. Bolger AM, Lohse M, Usadel B. Trimmomatic: a flexible trimmer for Illumina sequence data. *Bioinformatics* 2014;30:2114-2120.
4. Dobin A, Davis CA, Schlesinger F, Drenkow J, Zaleski C, Jha S, Batut P, et al. STAR: ultrafast universal RNA-seq aligner. *Bioinformatics* 2013;29:15-21.
5. Li B, Dewey CN. RSEM: accurate transcript quantification from RNA-Seq data with or without a reference genome. *BMC Bioinformatics* 2011;12:323.
6. Langmead B, Trapnell C, Pop M, Salzberg SL. Ultrafast and memory-efficient alignment of short DNA sequences to the human genome. *Genome Biol* 2009;10:R25.
7. Kim D, Langmead B, Salzberg SL. HISAT: a fast spliced aligner with low memory requirements. *Nat Methods* 2015;12:357-360.
8. Trapnell C, Williams BA, Pertea G, Mortazavi A, Kwan G, van Baren MJ, Salzberg SL, et al. Transcript assembly and quantification by RNA-Seq reveals unannotated transcripts and isoform switching during cell differentiation. *Nat Biotechnol* 2010;28:511-515.
9. Chen W, Desert R, Ge X, Han H, Song Z, Das S, Athavale D, et al. The Matrisome Genes From Hepatitis B-Related Hepatocellular Carcinoma Unveiled. *Hepatol Commun* 2021;5:1571-1585.
10. Wang M, Gong Q, Zhang J, Chen L, Zhang Z, Lu L, Yu D, et al. Characterization of gene expression profiles in HBV-related liver fibrosis patients and identification of ITGBL1 as a key regulator of fibrogenesis. *Sci Rep* 2017;7:43446.
11. Mas VR, Maluf DG, Archer KJ, Yanek K, Kong X, Kulik L, Freise CE, et al. Genes involved in viral carcinogenesis and tumor initiation in hepatitis C virus-induced hepatocellular carcinoma. *Mol Med* 2009;15:85-94.

- 
12. Moylan CA, Pang H, Dellinger A, Suzuki A, Garrett ME, Guy CD, Murphy SK, et al. Hepatic gene expression profiles differentiate presymptomatic patients with mild versus severe nonalcoholic fatty liver disease. *Hepatology* 2014;59:471-482.
  13. **Trepo E, Goossens N**, Fujiwara N, Song WM, Colaprico A, Marot A, Spahr L, et al. Combination of Gene Expression Signature and Model for End-Stage Liver Disease Score Predicts Survival of Patients With Severe Alcoholic Hepatitis. *Gastroenterology* 2018;154:965-975.
  14. Hoang SA, Oseini A, Feaver RE, Cole BK, Asgharpour A, Vincent R, Siddiqui M, et al. Gene Expression Predicts Histological Severity and Reveals Distinct Molecular Profiles of Nonalcoholic Fatty Liver Disease. *Sci Rep* 2019;9:12541.
  15. Han ES, Wu Y, McCarter R, Nelson JF, Richardson A, Hilsenbeck SG. Reproducibility, sources of variability, pooling, and sample size: important considerations for the design of high-density oligonucleotide array experiments. *J Gerontol A Biol Sci Med Sci* 2004;59:306-315.
  16. Ritchie ME, Phipson B, Wu D, Hu Y, Law CW, Shi W, Smyth GK. Limma powers differential expression analyses for RNA-sequencing and microarray studies. *Nucleic Acids Res* 2015;43:e47.
  17. **Robinson MD, McCarthy DJ**, Smyth GK. edgeR: a Bioconductor package for differential expression analysis of digital gene expression data. *Bioinformatics* 2010;26:139-140.
  18. Conway JR, Lex A, Gehlenborg N. UpSetR: an R package for the visualization of intersecting sets and their properties. *Bioinformatics* 2017;33:2938-2940.
  19. **Tuominen I, Fuqua BK**, Pan C, Renaud N, Wroblewski K, Civelek M, Clerkin K, et al. The Genetic Architecture of Carbon Tetrachloride-Induced Liver Fibrosis in Mice. *Cell Mol Gastroenterol Hepatol* 2021;11:199-220.
  20. Szklarczyk D, Gable AL, Lyon D, Junge A, Wyder S, Huerta-Cepas J, Simonovic M, et al. STRING v11: protein-protein association networks with increased coverage, supporting functional discovery in genome-wide experimental datasets. *Nucleic Acids Res* 2019;47:D607-D613.
  21. Shannon P, Markiel A, Ozier O, Baliga NS, Wang JT, Ramage D, Amin N, et al.

---

Cytoscape: a software environment for integrated models of biomolecular interaction networks. *Genome Res* 2003;13:2498-2504.

22. Yu G, Wang LG, Han Y, He QY. clusterProfiler: an R package for comparing biological themes among gene clusters. *OMICS* 2012;16:284-287.

23. Kumar L, M EF. Mfuzz: a software package for soft clustering of microarray data. *Bioinformatics* 2007;2:5-7.

24. Becht E, Giraldo NA, Lacroix L, Buttard B, Elarouci N, Petitprez F, Selves J, et al. Estimating the population abundance of tissue-infiltrating immune and stromal cell populations using gene expression. *Genome Biol* 2016;17:218.

25. Ramasamy A, Mondry A, Holmes CC, Altman DG. Key issues in conducting a meta-analysis of gene expression microarray datasets. *PLoS Med* 2008;5:e184.

26. Cabral F, Miller CM, Kudrna KM, Hass BE, Daubendiek JG, Kellar BM, Harris EN. Purification of Hepatocytes and Sinusoidal Endothelial Cells from Mouse Liver Perfusion. *J Vis Exp* 2018;132:56993.

27. Su T, Yang Y, Lai S, Jeong J, Jung Y, McConnell M, Utsumi T, et al. Single-Cell Transcriptomics Reveals Zone-Specific Alterations of Liver Sinusoidal Endothelial Cells in Cirrhosis. *Cell Mol Gastroenterol Hepatol* 2021;11:1139-1161.

28. Butler A, Hoffman P, Smibert P, Papalexi E, Satija R. Integrating single-cell transcriptomic data across different conditions, technologies, and species. *Nat Biotechnol* 2018;36:411-420.

29. Gu Z, Eils R, Schlesner M. Complex heatmaps reveal patterns and correlations in multidimensional genomic data. *Bioinformatics* 2016;32:2847-2849.

30. Ramachandran P, Dobie R, Wilson-Kanamori JR, Dora EF, Henderson BEP, Luu NT, Portman JR, et al. Resolving the fibrotic niche of human liver cirrhosis at single-cell level. *Nature* 2019;575:512-518.

31. **Dobie R, Wilson-Kanamori JR**, Henderson BEP, Smith JR, Matchett KP, Portman JR, Wallenborg K, et al. Single-Cell Transcriptomics Uncovers Zonation of Function in the Mesenchyme during Liver Fibrosis. *Cell Rep* 2019;29:1832-1847 e1838.

32. Chu T, Wang Z, Pe'er D, Danko CG. Cell type and gene expression deconvolution with BayesPrism enables Bayesian integrative analysis across bulk and single-cell

RNA sequencing in oncology. Nat Cancer 2022;3:505-517.

**Author names in bold designate shared co-first authorship**



## SUPPLEMENTARY FIGURES

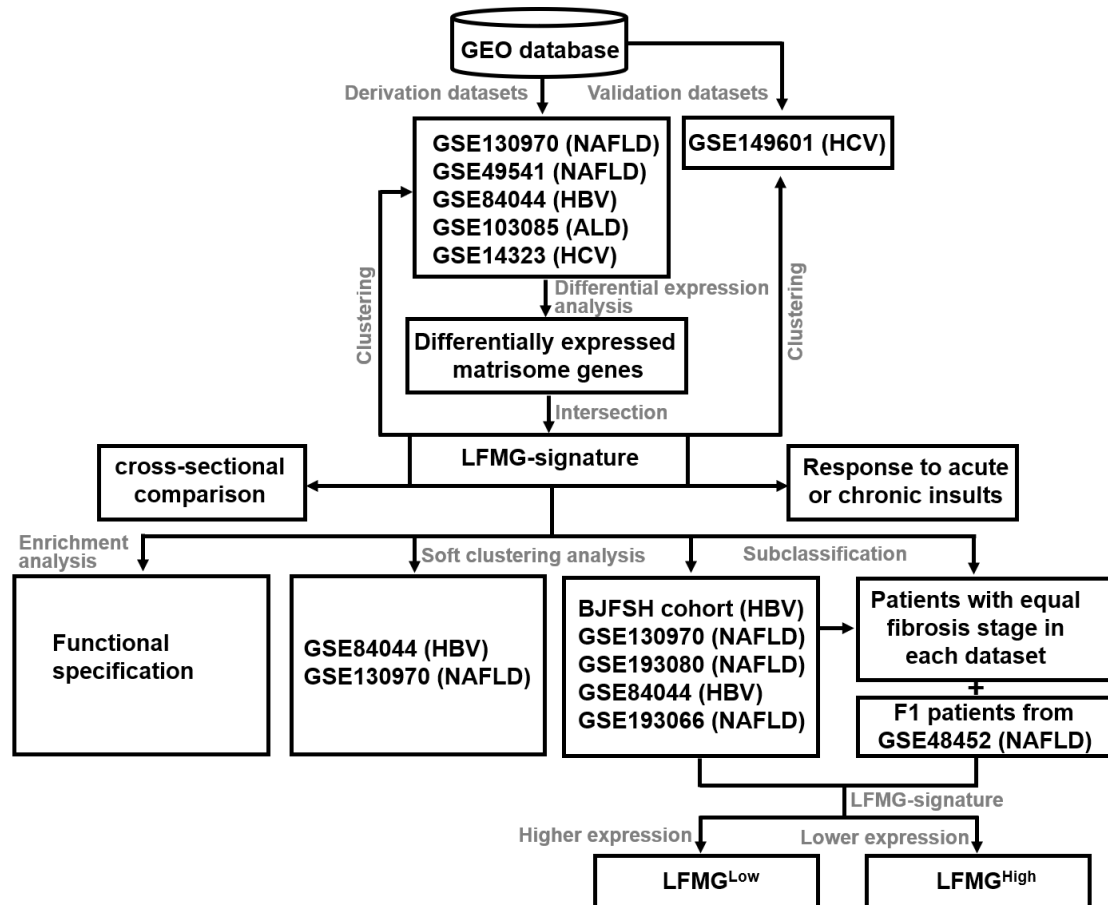

Figure S1. Flowchart for LFMG signature identification and molecular subclassification of liver fibrosis patients.

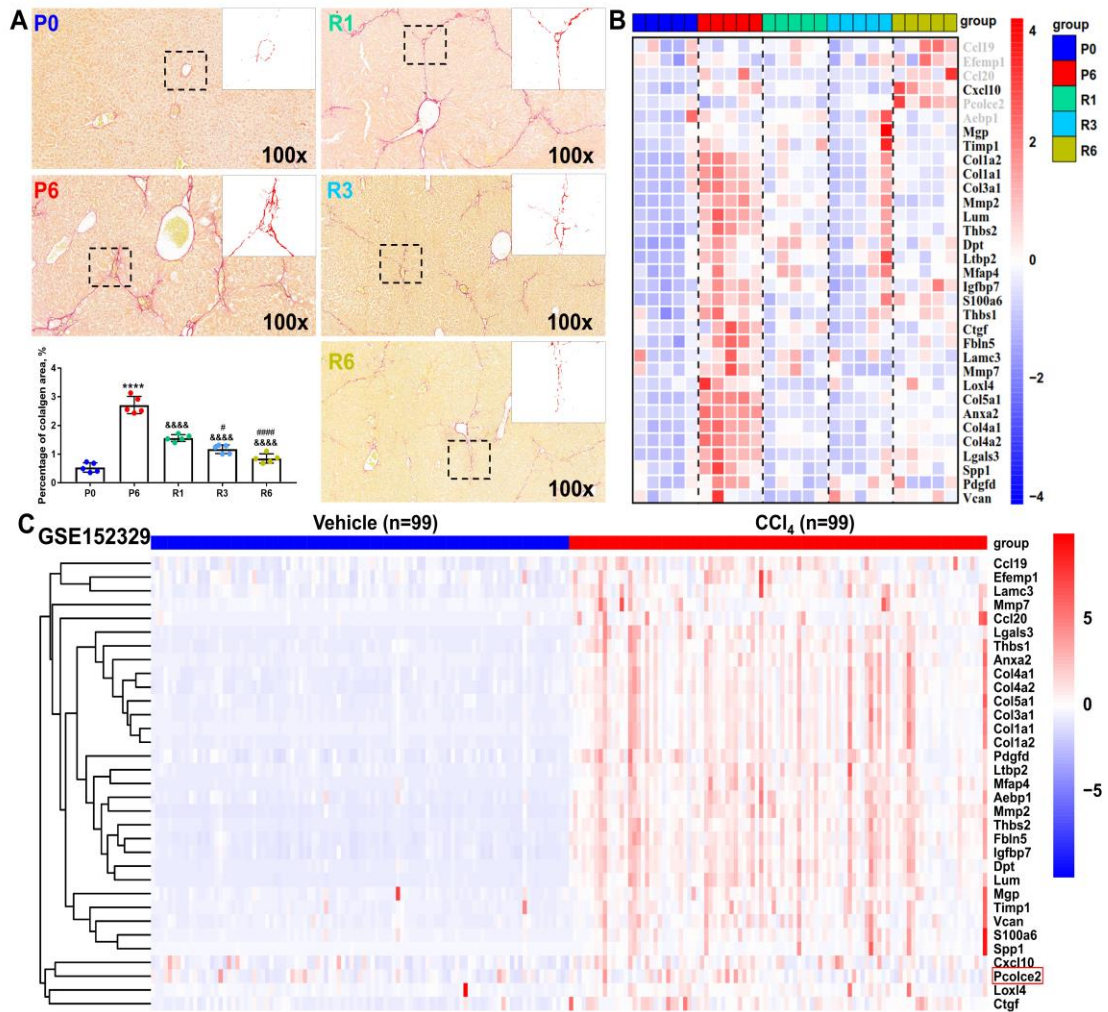

**Figure S2. LFMGs expression in CCl<sub>4</sub>-induced liver fibrosis and regression mice.**

**(A)** Sirius red staining and quantitation of positive area of collagenous fibers in liver sections from CCl<sub>4</sub>-induced liver fibrosis and regression in mice (our newly established mouse models). Zoomed images of positive areas of collagenous fibers are shown on the top right corner of each image. Comparison among the three groups were performed using one-way ANOVA followed by Tukey's multiple comparisons test or Kruskal-Wallis test. \*\*\*\* $p < 0.0001$  vs P0; &&&& $p < 0.0001$  vs P6; # $p < 0.05$  and ##### $p < 0.01$  vs R1;  $n = 5$ /group. **(B)** Heatmap of the LFMGs expression in each group of mice. Expression levels are scaled as a distribution with mean=0 and SD=1. The darker the blue, the lower the expression; the darker the red, the higher the expression. LFMGs

not significantly dysregulated in P6 compared to P0 group are highlighted in grey. **(C)** Heatmap of LFMGs expression in livers from the CCl<sub>4</sub>- or mineral oil-injected hybrid mouse diversity panel consisting of ~100 inbred strains of mice (n=99 for each group) from the publicly available dataset GSE152329. Except for *Pcolce2* ( $p>0.05$ , highlighted by red rectangle), the other LFMGs were significantly upregulated in CCl<sub>4</sub>-treated mice ( $p<0.05$  and  $FC>1.5$ ). Expression levels of LFMGs in the heatmap are scaled as a distribution with mean=0 and SD=1. The darker the blue, the lower the expression; the darker the red, the higher the expression. Since there are no orthologous mouse genes corresponding to human *CLEC4M* and *CXCL6*, the other 33 LFMGs were analyzed in all mice studies in our present study.

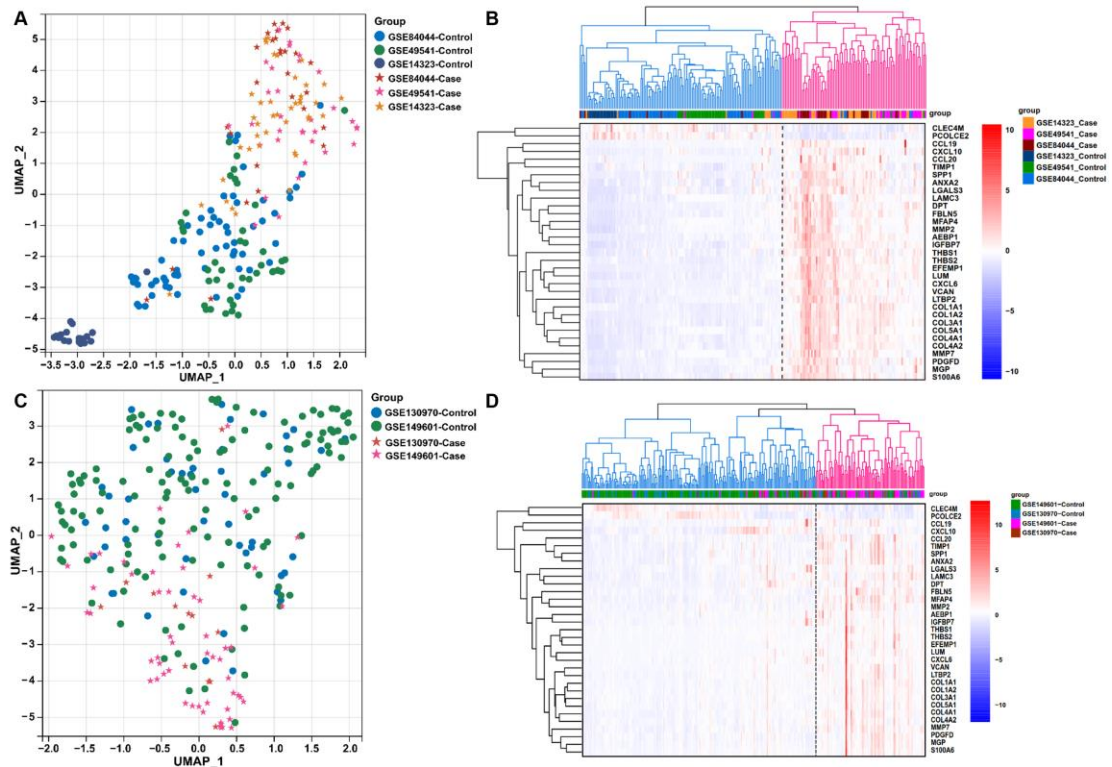

**Figure S3. Cross-sectional comparison of the LFMGs expression pattern among liver fibrosis patients with different etiologies.** UMAP plot and unsupervised HCL clustering of merged healthy (mild fibrosis) and fibrotic (advanced) liver samples from (A and B) GSE84044 (HBV), GSE49541 (NAFLD) and GSE14323 (HCV) datasets or (C and D) GSE130970 (NAFLD) and GSE149601 (HCV) datasets. Grouped liver samples in the UMAP plot are color- and shape-coded. Liver samples in HCL heatmaps are also color-coded. Expression level of LFMGs in heatmap are scaled as a distribution with mean=0 and SD=1. The darker the blue, the lower the expression; the darker the red, the higher the expression.

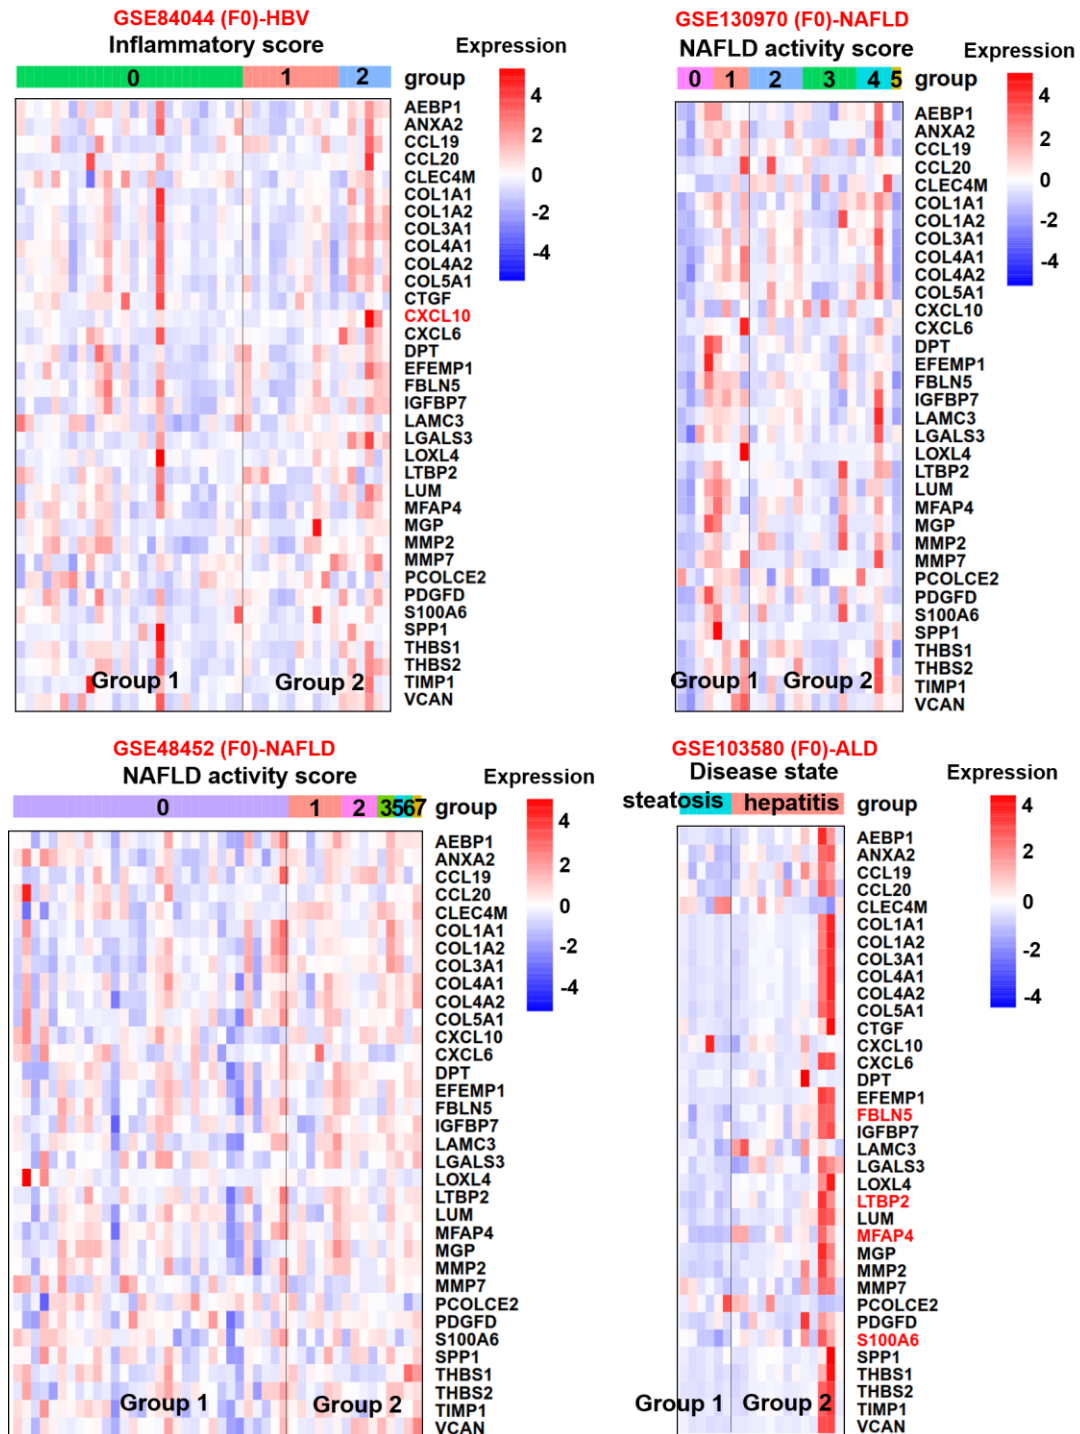

**Figure S4. LFMG signature expression along with liver disease progression prior to fibrosis.** Non-fibrotic (F0) patients from GSE84044 (HBV), GSE130970 (NAFLD), GSE48452 (NAFLD) and GSE103580 datasets were used to analyze the response of the LFMG signature to disease progression preceding fibrosis. The LFMG signature expression between Group 1 and 2 patients along with inflammation or NAFLD activity

progression was compared. Unpaired student's  $t$  test or Mann–Whitney U test were performed. A LFMG expression significantly different between groups was highlighted in red ( $p < 0.05$  and  $FC > 1.5$ ). Expression of LFMGs in heatmap are scaled as a distribution with mean=0 and SD=1. The darker the blue, the lower the expression; the darker the red, the higher the expression.

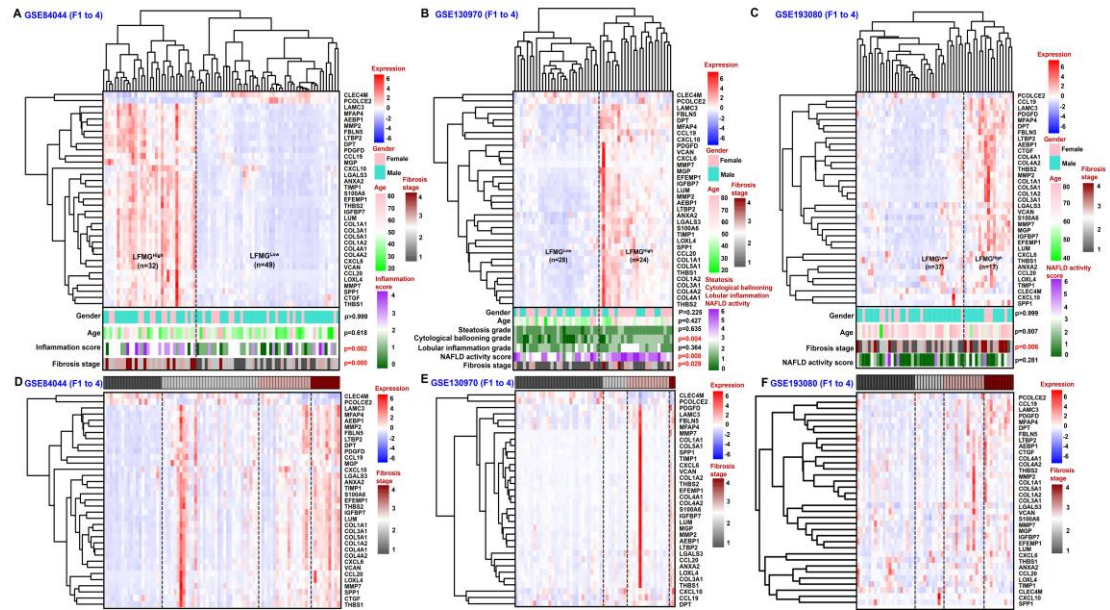

**Figure S5. Subclassification of liver fibrosis patients from the GSE84044, GSE130970 and GSE193080 datasets.** The LFMG signature subclassified liver fibrosis patients from **(A)** GSE84044 (HBV), **(B)** GSE130970 (NAFLD) and **(C)** GSE193080 (NAFLD) into LFMG<sup>High</sup> and LFMG<sup>Low</sup> subgroups. Gender, age, inflammation score, fibrosis stage, steatosis grade, ballooning grade and NAFLD activity score were color-coded and compared between LFMG<sup>High</sup> and LFMG<sup>Low</sup> patients. A  $p < 0.05$  was considered as statistically significant. Relationship between fibrosis stage and the LFMG signature expression pattern in liver fibrosis patients from **(D)** GSE84044, **(E)** GSE130970 and **(F)** GSE193080 were visualized using heatmaps. Fibrosis stage was color-coded. LFMG signature expression is scaled as a distribution with mean=0 and SD=1. The darker the blue, the lower the expression; the darker the red, the higher the expression.

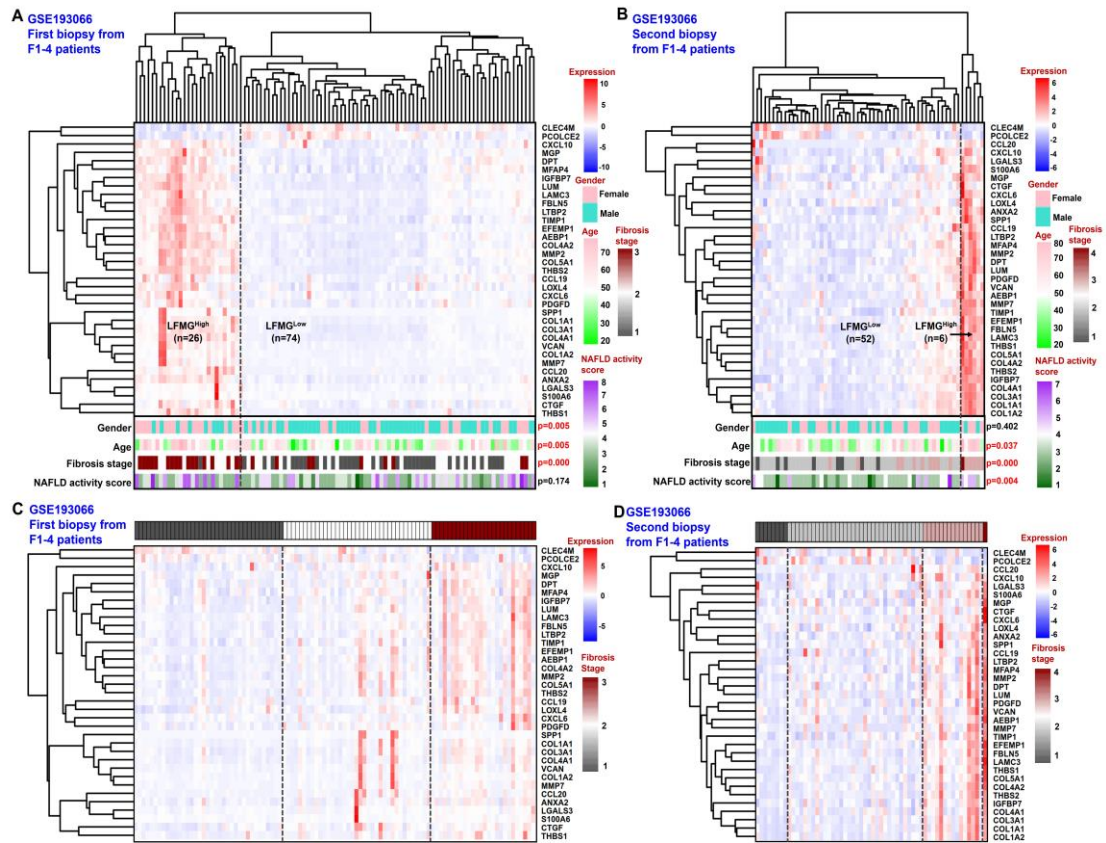

**Figure S6. Subclassification of liver fibrosis patients from the GSE193066 dataset.** The LFMG signature subclassified liver fibrosis patients undergoing (A) first or (B) second biopsy from GSE193066 (NAFLD) into LFMG<sup>Low</sup> and LFMG<sup>High</sup> subgroups. Gender, age, fibrosis stage and NAFLD activity score were color-coded and compared between LFMG<sup>High</sup> and LFMG<sup>Low</sup> patients. A  $p < 0.05$  was considered as statistically significant. Relationship between fibrosis stage and the LFMG signature expression pattern in liver fibrosis patients undergoing (C) first or (D) second biopsy from GSE193066 (NAFLD) were visualized using heatmaps. Fibrosis stage was color-coded. LFMG signature expression is scaled as a distribution with mean=0 and SD=1. The darker the blue, the lower the expression; the darker the red, the higher the expression.



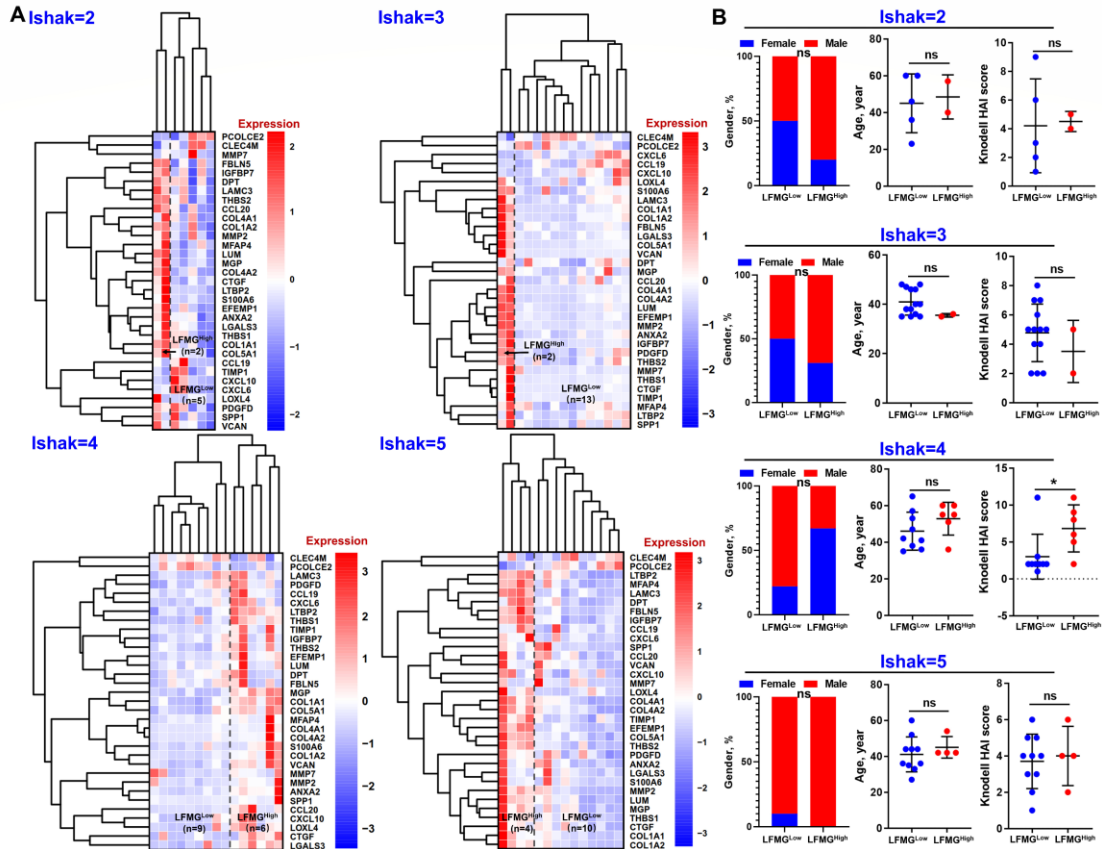

**Figure S7. Subclassification of liver fibrosis patients with identical fibrosis stage from the BJFSH cohort. (A)** The LFMG signature subclassified liver fibrosis patients with equal fibrosis stage from Ishak 2 to 5 into LFMGLow and LFMGLow subgroups. The LFMG signature expression is scaled as a distribution with mean=0 and SD=1. The darker the blue, the lower the expression; the darker the red, the higher the expression. **(B)** Gender, age and Knodell score were compared between LFMGLow and LFMGLow patients. \* $p < 0.05$ ; ns, not significant.

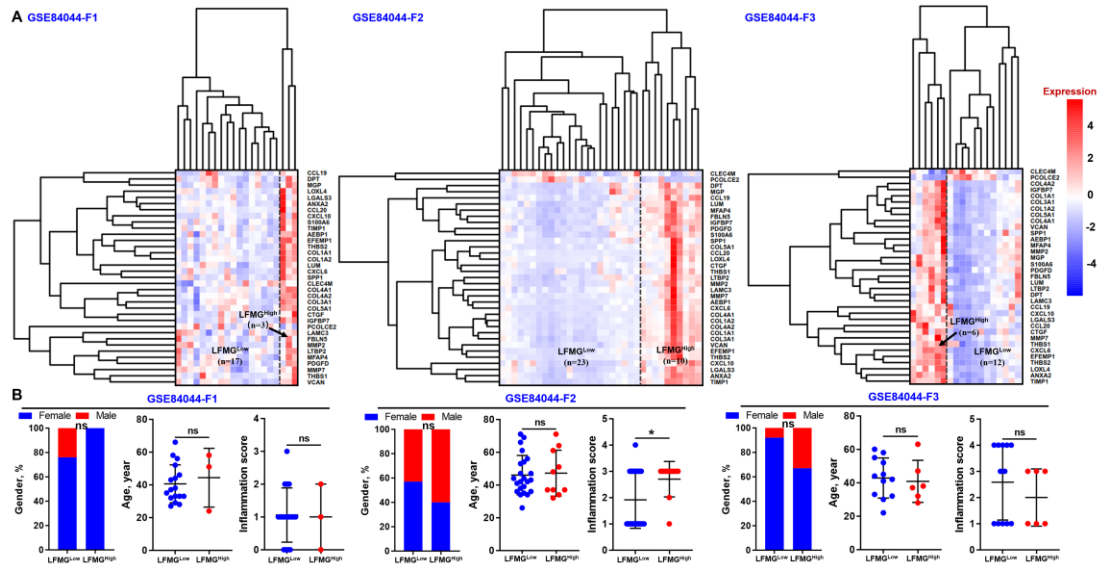

**Figure S8. Subclassification of liver fibrosis patients with identical fibrosis stage from GSE84044. (A)** LFMG signature subclassified liver fibrosis patients with equal fibrosis stage from METAVIR F1 to 3 into LFMG<sup>Low</sup> and LFMG<sup>High</sup> subgroups. The LFMG signature expression is scaled as a distribution with mean=0 and SD=1. The darker the blue, the lower the expression; the darker the red, the higher the expression. **(B)** Gender, age and inflammation score were compared between LFMG<sup>High</sup> and LFMG<sup>Low</sup> patients. \* $p < 0.05$ ; ns, not significant.

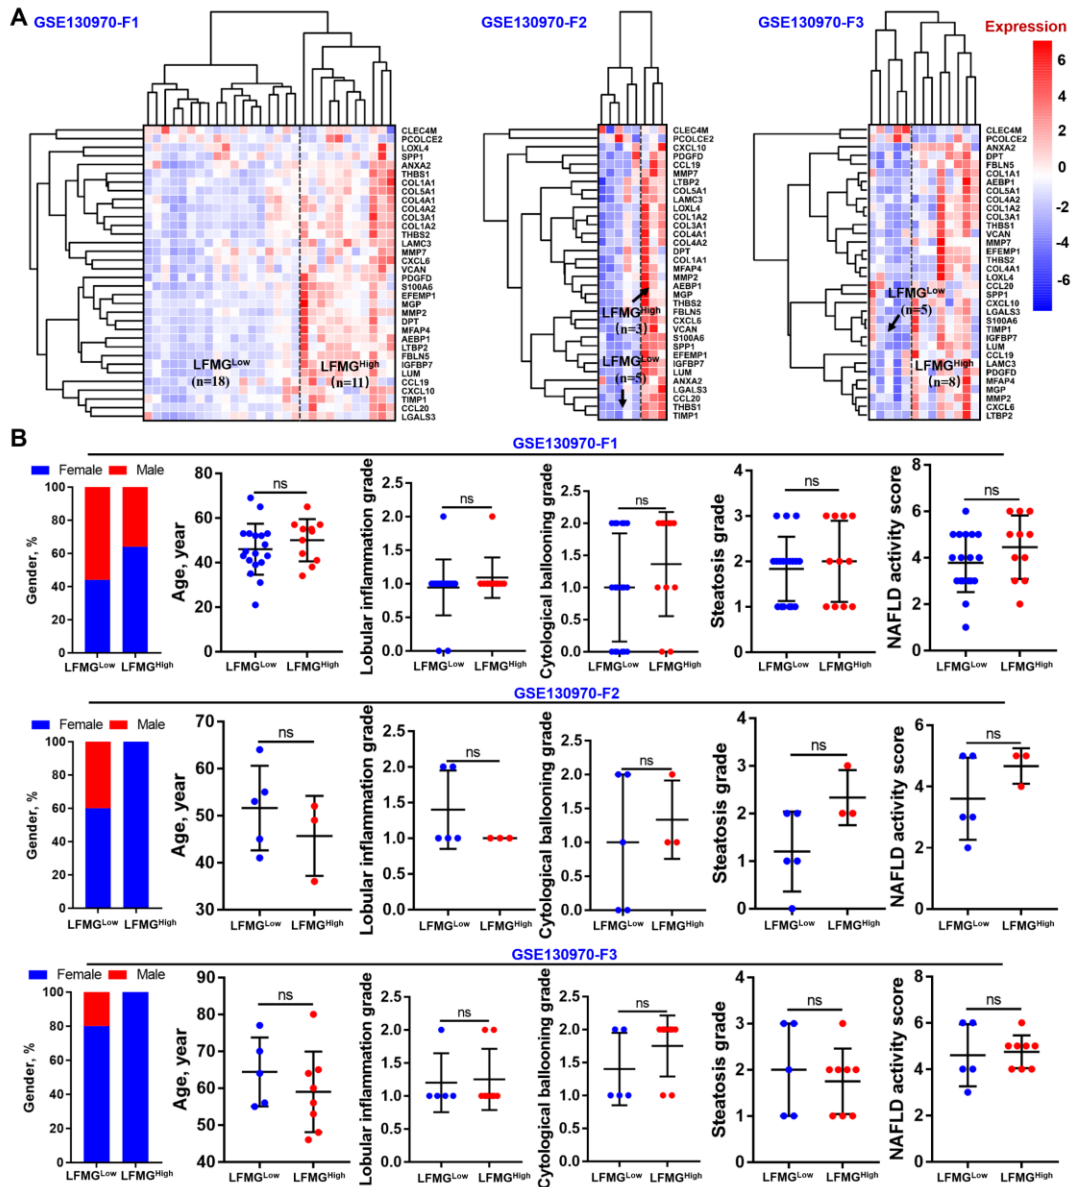

**Figure S9. Subclassification of liver fibrosis patients with identical fibrosis stage from GSE130970. (A)** The LFMG signature subclassified liver fibrosis patients with equal fibrosis stage from METAVIR F1 to 3 into LFMG<sup>Low</sup> and LFMG<sup>High</sup> subgroups. The LFMG signature expression is scaled as a distribution with mean=0 and SD=1. The darker the blue, the lower the expression; the darker the red, the higher the expression. **(B)** Gender, age, inflammation grade, ballooning grade, steatosis grade and NAFLD activity score were compared between LFMG<sup>High</sup> and LFMG<sup>Low</sup> patients. ns, not significant.

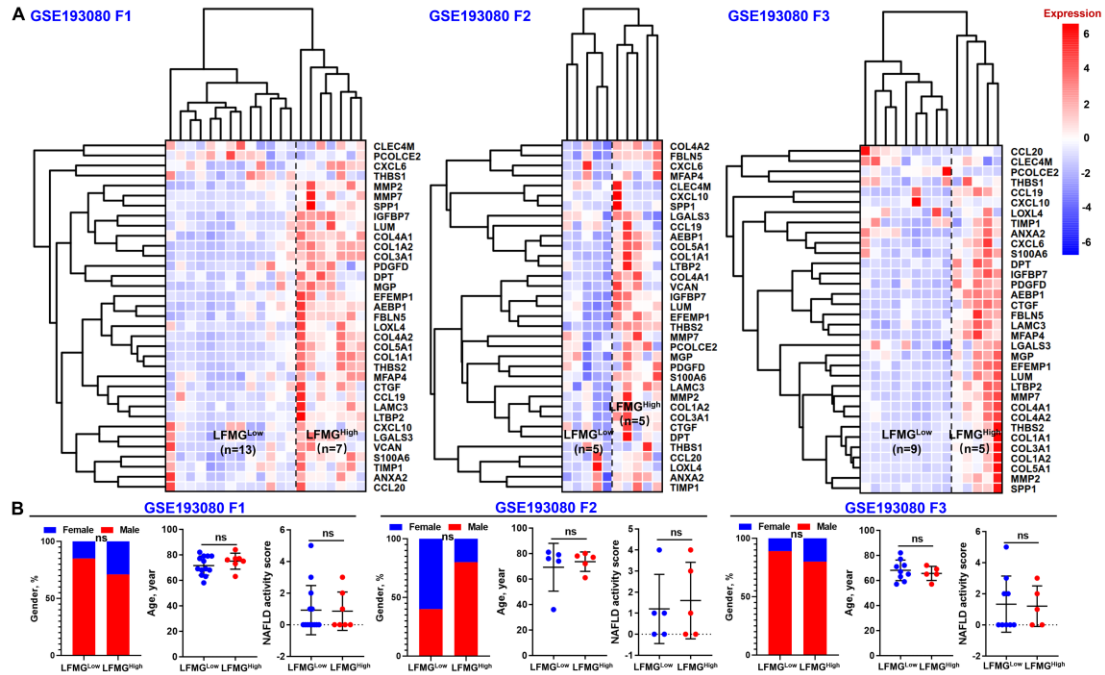

**Figure S10. Subclassification of liver fibrosis patients with identical fibrosis stage from GSE193080. (A)** The LFMG signature subclassified liver fibrosis patients with equal fibrosis stage from METAVIR F1 to 3 into LFMG<sup>Low</sup> and LFMG<sup>High</sup> subgroups. The LFMG signature expression is scaled as a distribution with mean=0 and SD=1. The darker the blue, the lower the expression. **(B)** Gender, age and NAFLD activity score were compared between LFMG<sup>High</sup> and LFMG<sup>Low</sup> patients. ns, not significant.



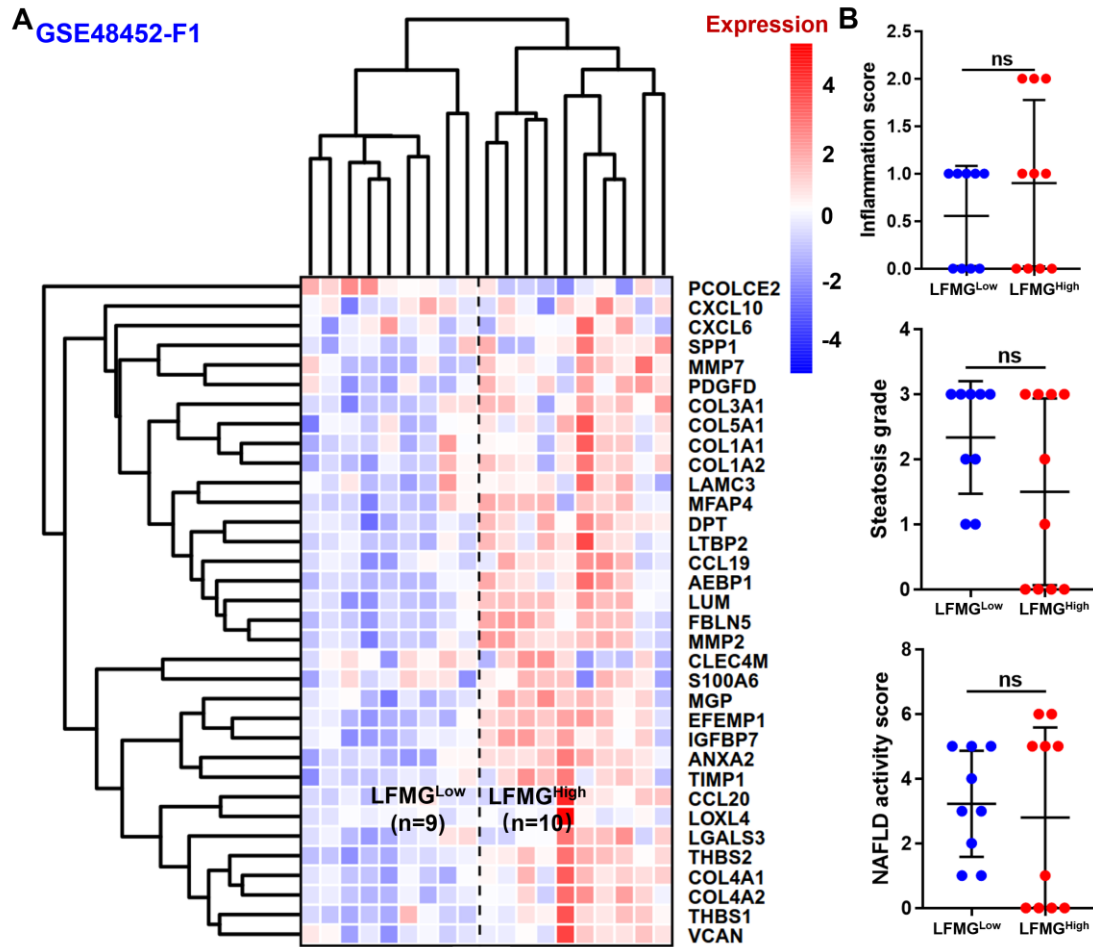

**Figure S12. Subclassification of liver fibrosis patients with identical fibrosis stage from GSE48452. (A)** The LFMG signature subclassified liver fibrosis patients with equal fibrosis stage (METAVIR F1) into LFMG<sup>Low</sup> and LFMG<sup>High</sup> subgroups. The LFMG signature expression is scaled as a distribution with mean=0 and SD=1. The darker the blue, the lower the expression; the darker the red, the higher the expression. **(B)** Inflammation score, steatosis grade and NAFLD activity score were compared between LFMG<sup>High</sup> and LFMG<sup>Low</sup> patients. ns, not significant.

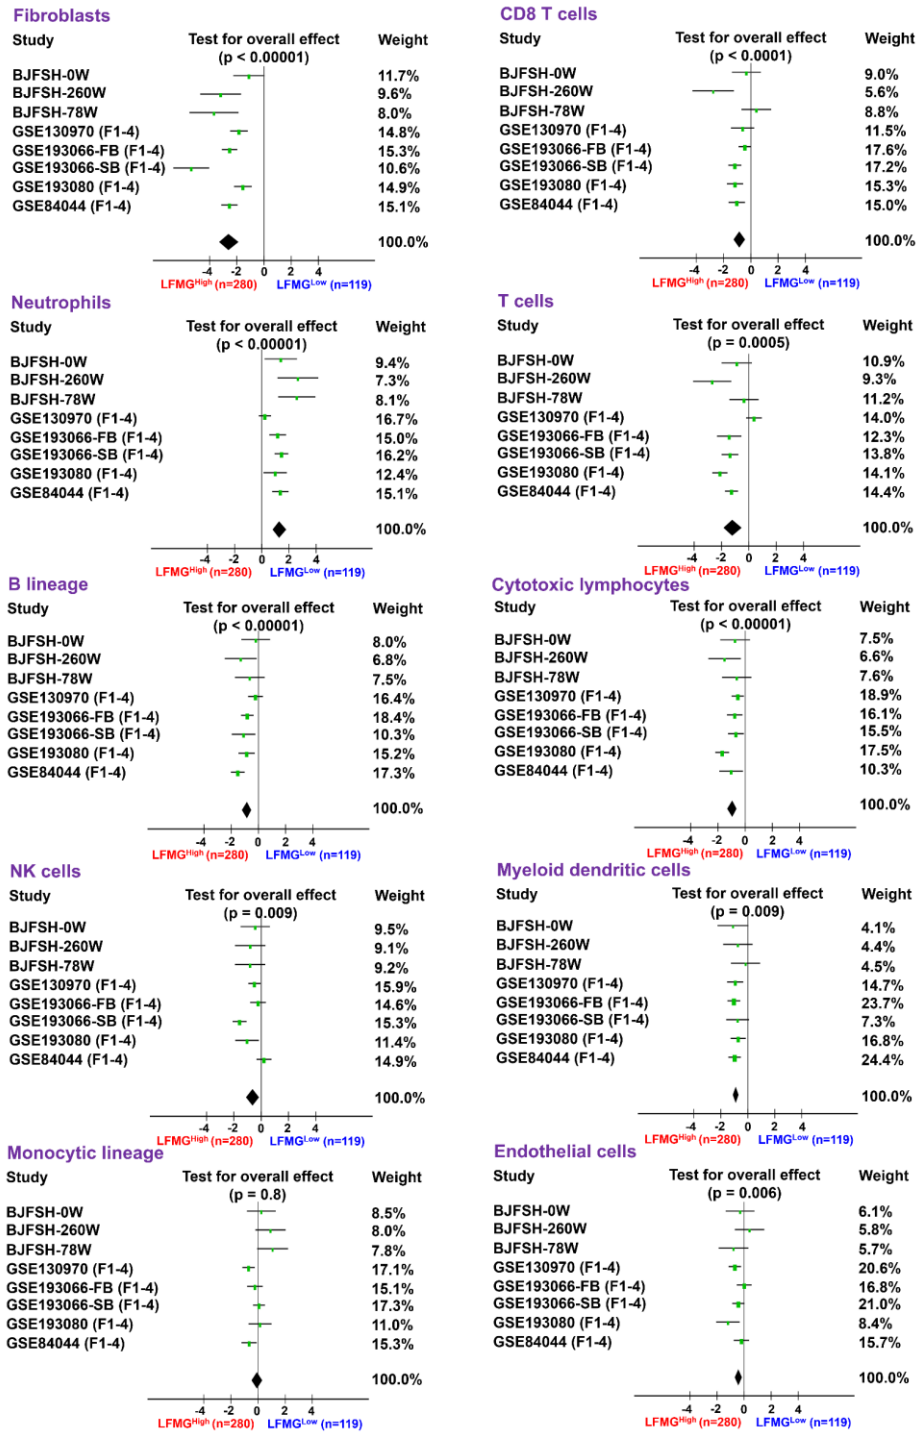

Figure S13. Comparison of liver infiltrating immune cells and fibroblasts between subgroups of patients from the BJFSH cohort (0W, 78W and 260W), GSE130970, GSE193066 (first and second liver biopsy), GSE193080 or GSE84044 datasets. Forest plots show comparisons of cell abundance (fibroblasts, neutrophils, B lineage, NK cells, monocytic lineage, CD8 T cells, T cells, cytotoxic

lymphocytes, myeloid dendritic cells and endothelial cells) between LFMG<sup>Low</sup> and LFMG<sup>High</sup> patients with varying fibrosis stages. Whiskers in the forest plots indicate the confidence interval of cell abundance. The overall effect among different datasets was assessed using Hedges' adjusted  $g$  based on a random effect model. A  $p < 0.05$  was considered as statistically significant.



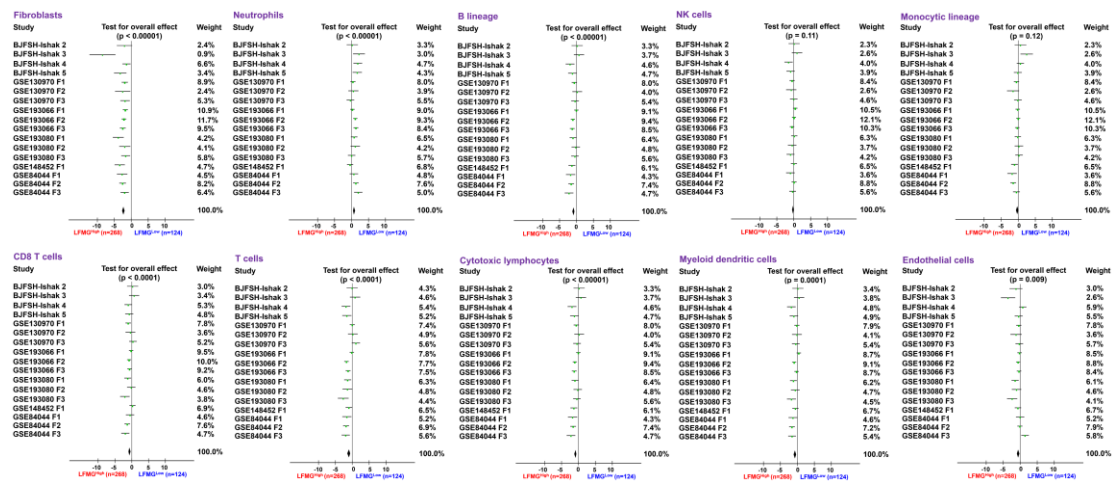

**Figure S14. Comparisons of liver infiltrating immune cells and fibroblasts between subgroups of patients with equal fibrosis stage from the BJFSH cohort and public datasets.** Forest plots showed the comparisons of cell abundance (fibroblasts, neutrophils, B lineage, NK cells, monocytic lineage, CD8 T cells, T cells, cytotoxic lymphocytes, myeloid dendritic cells and endothelial cells) between LFMG<sup>Low</sup> and LFMG<sup>High</sup> patients with equal fibrosis stage. Whiskers in the forest plots indicate the confidence interval of cell abundance. The overall effect among different datasets was assessed using Hedges' adjusted  $g$  based on a random effect model. A  $p < 0.05$  was considered as statistically significant.

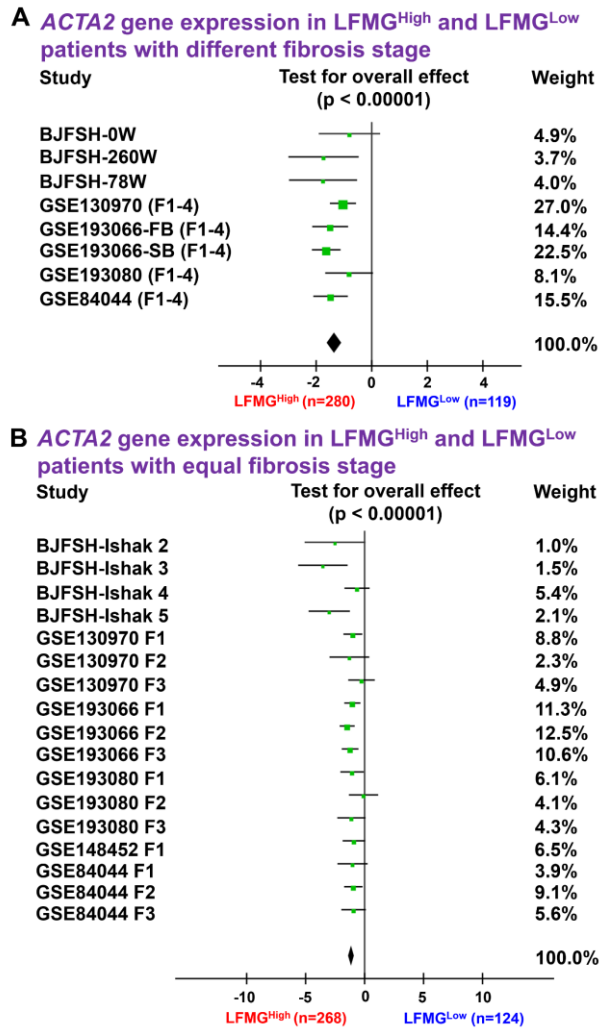

**Figure S15. Comparison of *ACTA2* gene expression between LFMG<sup>Low</sup> and LFMG<sup>High</sup> patients with or without identical fibrosis stage from the BJFSH cohort and public datasets.** Forest plots showed the comparison of *ACTA2* expression between LFMG<sup>Low</sup> and LFMG<sup>High</sup> patients with **(A)** varying or **(B)** equal fibrosis stages. Whiskers in the forest plots indicate the confidence interval of *ACTA2* expression. The overall effect among different datasets was assessed using Hedges' adjusted  $g$  based on a random effect model. A  $p < 0.05$  was considered as statistically significant.

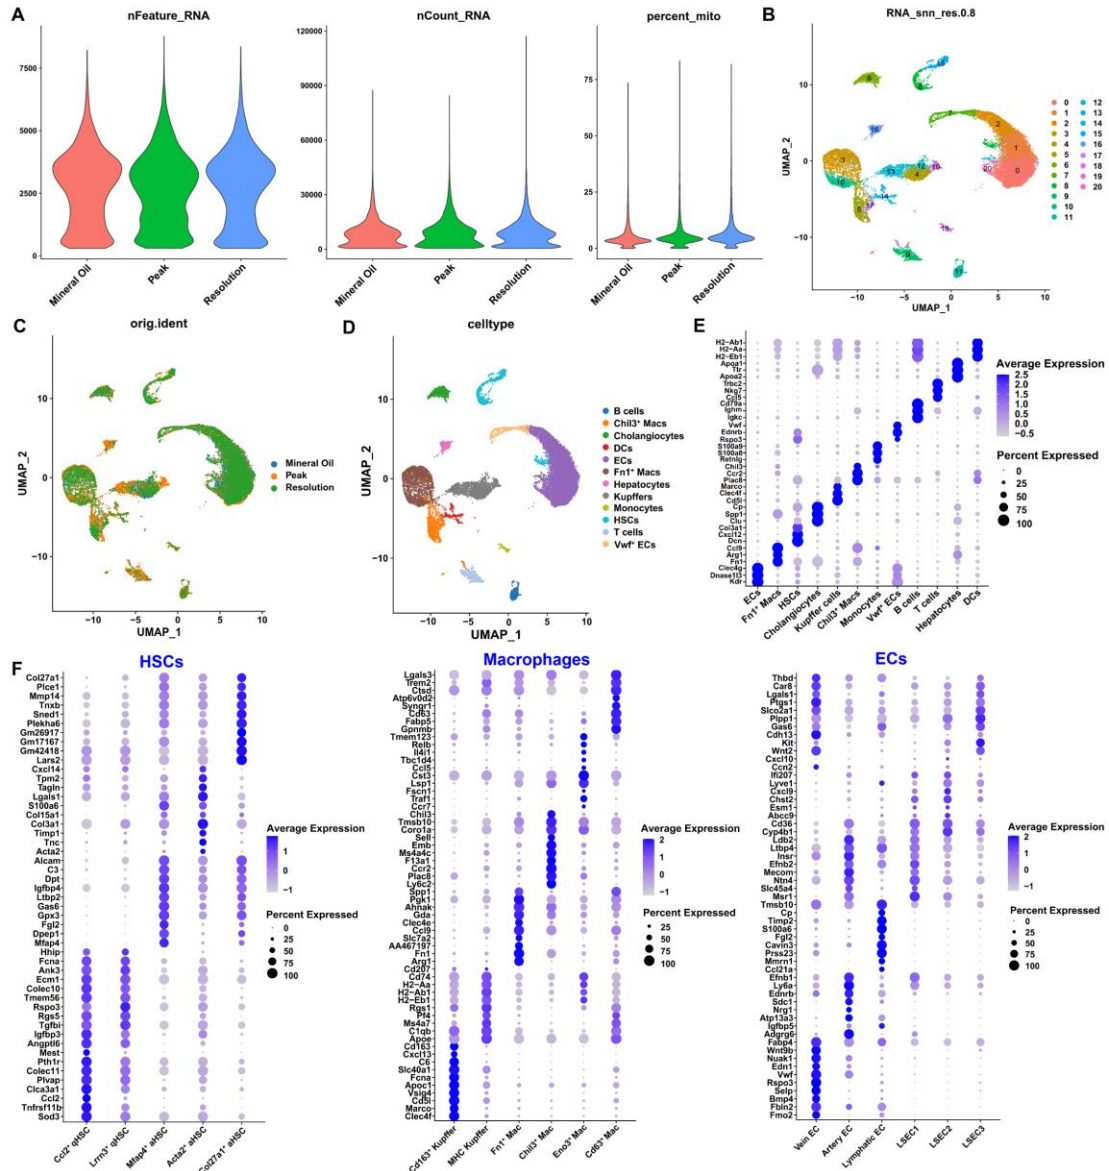

**Figure S16. Characterization of scRNA-seq from liver NPCs isolated from mice at peak fibrosis and resolution.** (A) Violin plot illustrating the number of genes (*nFeature\_RNA*), UMIs (*nCount\_RNA*) and the percentage of mitochondrial genes (*percent\_mito*) in each cell from mineral oil (control), peak liver fibrosis and resolution in mice, marked by red, green and light blue, respectively. (B) UMAP plot showing cell clusters color-coded according to gene expression characteristics. A total of 20 cell clusters were identified. (C) UMAP plot showing spatial distribution of color-coded cells from mineral oil, peak and resolution mice marked by red, green and light blue,

respectively. **(D)** UMAP plot showing annotated cell types based on canonical markers.

A total of 12 cell types were identified. **(E)** Dot plot showing the top 3 marker genes of

each cell type in **(D)**. **(F)** Dot plot showing the top marker genes for re-clustered cell

types of HSCs, macrophages and endothelial cells. Percentage of cells with

normalized expression level for marker genes is reflected by circle size; color intensity

reflects average expression level across all cells within each cluster.

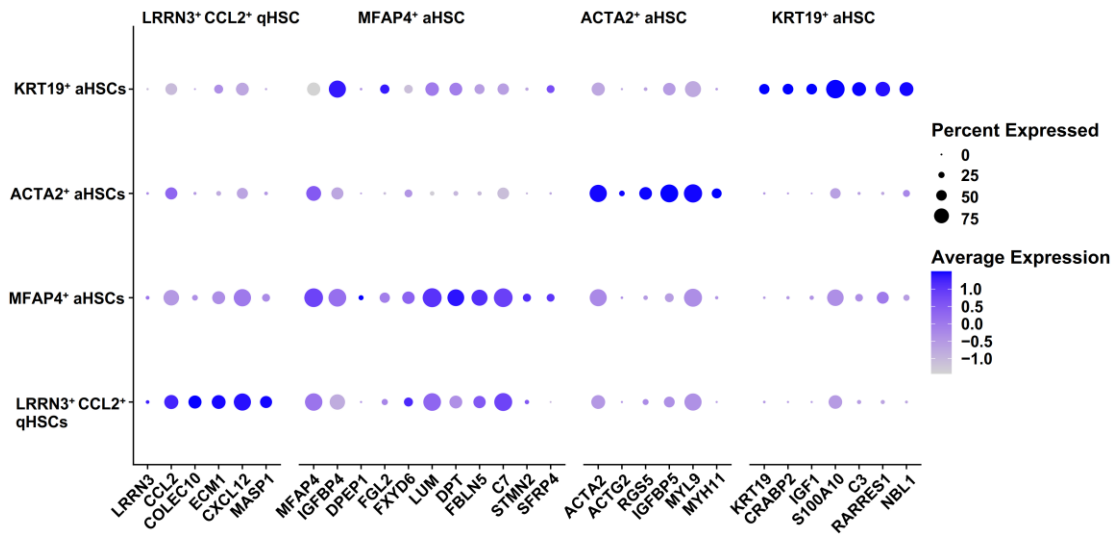

**Figure S17. Top marker genes for re-clustered cell types of HSCs (publicly available GSE136103).** Dot plot showing top marker genes for re-clustered cell types of HSCs. Percentage of cells with normalized expression level for marker genes is reflected by circle size; color intensity reflects average expression level across all cells within each cluster.

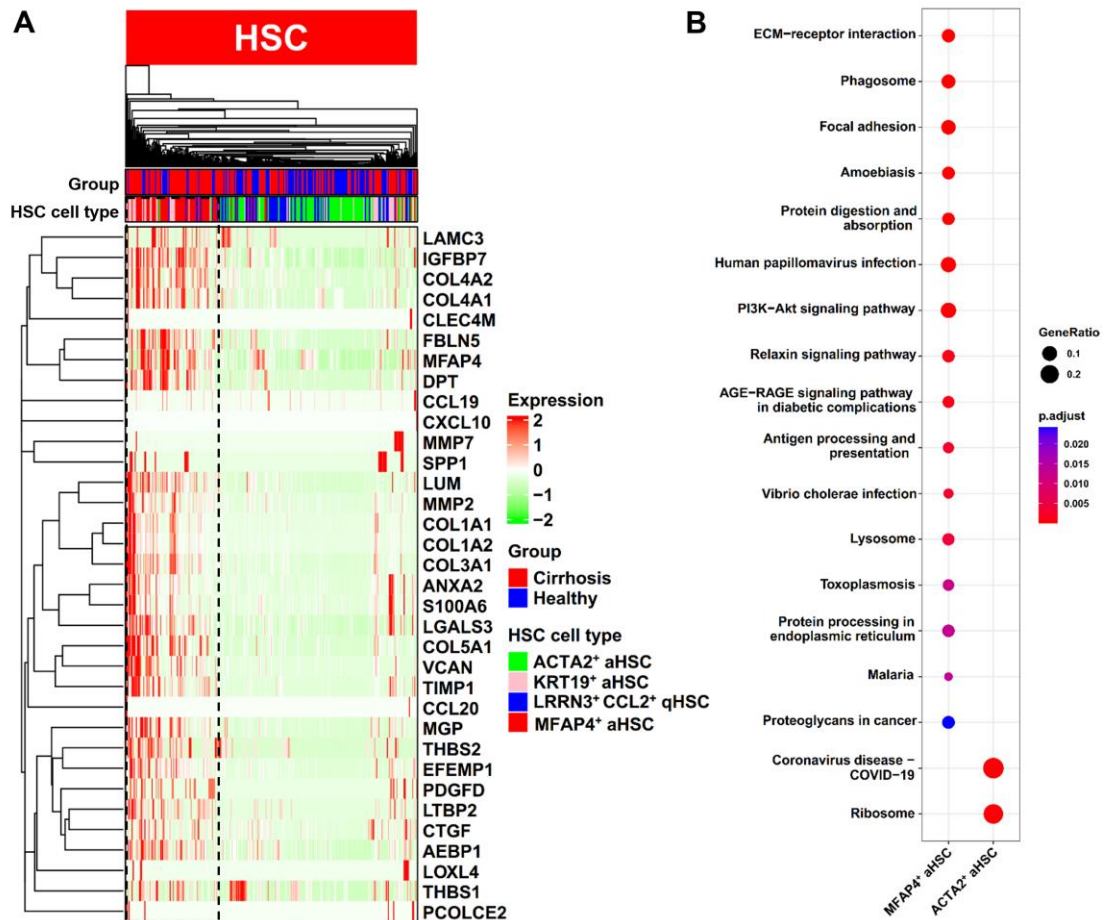

**Figure S18. The LFMG signature expression in re-clustered HSC subtypes identified from the GSE136103 dataset and functional analysis of MFAP4<sup>+</sup> aHSCs.**

**(A)** The heatmap shows the LFMG signature expression in 4 re-clustered HSC subtypes. Group (sample) and HSC cell types were color-coded. The LFMG signature expression is scaled as a distribution with mean=0 and SD=1. The darker the green, the lower the expression; the darker the red, the higher the expression. **(B)** Significantly enriched KEGG pathways related to MFAP4<sup>+</sup> and ACTA2<sup>+</sup> aHSCs based on the functional enrichment analysis of top 1,000 genes with the highest abundance in each cell type.

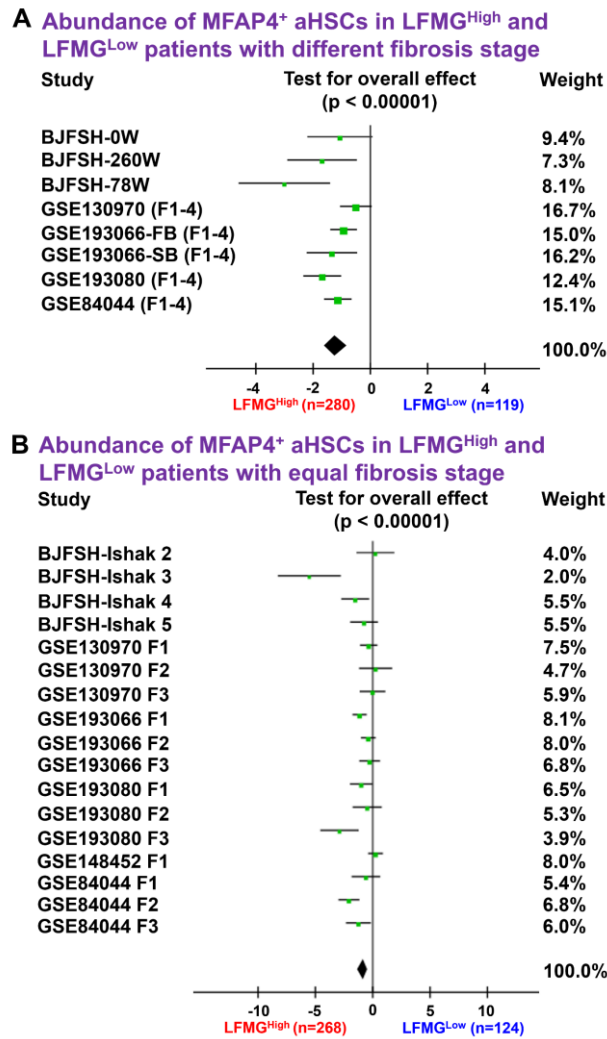

**Figure S19. Comparison of MFAP4<sup>+</sup> aHSC proportion between LFMG<sup>Low</sup> and LFMG<sup>High</sup> patients with or without identical fibrosis stages.** Forest plots showed the comparison of the MFAP4<sup>+</sup> aHSC percentage between LFMG<sup>Low</sup> and LFMG<sup>High</sup> patients with **(A)** varying or **(B)** equal fibrosis stages. MFAP4<sup>+</sup> aHSC proportion was deconvolved from bulk RNA-seq data using GSE136103 scRNAseq data as reference information. Whiskers in the forest plots indicate the confidence interval of the MFAP4<sup>+</sup> aHSC percentage. The overall effect among different datasets was assessed using Hedges' adjusted  $g$  based on a random effects model. A  $p < 0.05$  was considered as statistically significant.

## SUPPLEMENTARY TABLES

**Table S1. Publicly available gene expression profiles of liver fibrosis from GEO used in this study.**

| GEO ID           | Etiology | Sample size                               | Sample resource                  | Platform | Year |
|------------------|----------|-------------------------------------------|----------------------------------|----------|------|
| <b>GSE84044</b>  | HBV      | F0=43<br>F1=20<br>F2=33<br>F3=18<br>F4=10 | Frozen liver biopsy              | GPL570   | 2016 |
| <b>GSE14323</b>  | HCV      | Normal=19<br>LC=41                        | Liver transplantation            | GPL571   | 2009 |
| <b>GSE49541</b>  | NAFLD    | F0-1=40<br>F3-4=32                        | Frozen liver biopsy              | GPL570   | 2013 |
| <b>GSE103580</b> | ALD      | Non-LC=19<br>LC=67                        | FFPE liver biopsy                | GPL13667 | 2018 |
| <b>GSE130970</b> | NAFLD    | F0=25<br>F1=29<br>F2=8<br>F3=14<br>F4=2   | Frozen liver biopsy              | GPL16791 | 2019 |
| <b>GSE149601</b> | HCV      | Non-LC=140<br>LC=55                       | Liver biopsy                     | GPL20301 | 2020 |
| <b>GSE193066</b> | NAFLD    | F1=45<br>F2=71<br>F3=41<br>F4=1           | Liver biopsy                     | GPL18573 | 2022 |
| <b>GSE193080</b> | NAFLD    | F1=20<br>F2=10<br>F3=14<br>F4=10          | FFPE tumor-adjacent liver tissue | GPL18573 | 2022 |
| <b>GSE48452</b>  | NAFLD    | F0=46<br>F1=19                            | Liver biopsy                     | GPL11532 | 2013 |

**Abbreviations:** ALD, alcohol-associated liver disease; FFPE, formalin-fixed and paraffin-embedded; GEO, Gene Expression Omnibus; HBV, hepatitis B virus; HCV, hepatitis C virus; LC, liver cirrhosis; FFPE, formalin-fixed and paraffin-embedded; NAFLD, non-alcoholic fatty liver disease.



**Table S2. Detailed information of antiviral therapy and timepoint of liver biopsy patients from the BJFSH cohort.**

| Patient ID | Age | Gender | Treatment | Timepoint of liver biopsy |          |           |
|------------|-----|--------|-----------|---------------------------|----------|-----------|
|            |     |        |           | Baseline                  | 78 weeks | 260 weeks |
| 1          | 38  | M      | ETT       | Yes                       | Yes      | Yes       |
| 2          | 35  | M      | ETT       | Yes                       | Yes      | Yes       |
| 3          | 42  | M      | ETT       | Yes                       | Yes      | Yes       |
| 4          | 36  | F      | ETT       | Yes                       | Yes      | Yes       |
| 5          | 46  | M      | ETT       | Yes                       | Yes      | Yes       |
| 6          | 40  | F      | ETT       | Yes                       | Yes      | Yes       |
| 7          | 60  | F      | ETT       | Yes                       | Yes      | Yes       |
| 8          | 44  | M      | ETN       | Yes                       | Yes      | Yes       |
| 9          | 60  | M      | ETN       | Yes                       | Yes      | Yes       |
| 10         | 36  | M      | ETN       | Yes                       | Yes      | Yes       |
| 11         | 55  | M      | ETV       | Yes                       | Yes      | -         |
| 12         | 35  | M      | ETV       | Yes                       | Yes      | -         |
| 13         | 57  | M      | ETT       | Yes                       | Yes      | -         |
| 14         | 48  | F      | ETT       | Yes                       | -        | Yes       |
| 15         | 47  | M      | ETT       | Yes                       | -        | Yes       |
| 16         | 36  | M      | ETT       | -                         | Yes      | Yes       |
| 17         | 23  | F      | ETT       | Yes                       | -        | -         |
| 18         | 51  | F      | ETV       | -                         | -        | Yes       |
| 19         | 53  | F      | ETT       | -                         | -        | Yes       |
| 20         | 41  | M      | ETN       | -                         | -        | Yes       |
| 21         | 52  | M      | ETN       | -                         | -        | Yes       |
| 22         | 42  | M      | ETV       | -                         | -        | Yes       |
| 23         | 35  | M      | ETV       | -                         | -        | Yes       |
| 24         | 44  | F      | ETN       | -                         | -        | Yes       |
| 25         | 65  | M      | ETN       | -                         | -        | Yes       |
| 26         | 54  | M      | ETN       | -                         | -        | Yes       |
| 27         | 33  | M      | ETT       | -                         | Yes      | -         |
| 28         | 27  | M      | ETT       | -                         | Yes      | -         |

**Abbreviations:** ETN, combination of entecavir and alpha interferon therapy; ETT, combination of entecavir and alpha thymosin; ETV, entecavir; F, female; M, male. “Yes” represents patient that underwent liver biopsy at the indicated timepoint and “-” represents patient that did not undergo liver biopsy at the indicated timepoint.

**Table S3. Clinical characteristics of HBV-related liver fibrosis patients pre- or post-treatment.**

|                         | Baseline (n=16)      | 78 weeks (n=16)      | 260 weeks (n=22)                   |
|-------------------------|----------------------|----------------------|------------------------------------|
| Age, year               | 43.9±10.4            | 42.5±10.3            | 45.7±8.8                           |
| Gender                  | M=11                 | M=13                 | M=15                               |
| WBC, 10 <sup>9</sup> /L | 4.7±0.9              | 4.0±1.1              | 5.7±1.2* <sup>###</sup>            |
| PLT, 10 <sup>9</sup> /L | 160.0 (147.5, 182.0) | 128.0 (105.5, 151.5) | 182.5 (161.5, 205.8) <sup>##</sup> |
| ALT, U/L                | 63.5 (48.7, 106.5)   | 28.5 (20.8, 33.0)**  | 21.0 (16.3, 26.0)**                |
| AST, U/L                | 46.5 (35.3, 65.8)    | 26.0 (28.4, 20.4)**  | 20.5 (16.6, 24.5)**                |
| ALP, U/L                | 71.5 (67.0, 98.0)    | 70.5 (63.8, 80.0)    | 78.0 (70.3, 86.8)                  |
| GGT, U/L                | 35.9 (26.8, 63.5)    | 28.0 (24.0, 29.5)    | 20.5 (15.5, 42.5)                  |
| ALB, g/L                | 41.5±4.5             | 42.7±4.3             | 45.6±4.0*                          |
| TBIL, µmol/L            | 17.4±6.8             | 13.7±4.4             | 17.2±7.6                           |
| AFP, ng/ml              | 9.5 (3.6, 17.8)      | 3.8 (2.7, 6.5)       | 2.5 (1.9, 3.8)**                   |
| LSM, kPa                | 11.8 (7.1, 14.7)     | 7.8 (6.5, 11.1)      | 6.1 (5.1, 11.4)                    |
| Log (HBV DNA)           | 7.3 (6.8, 8.0)       | 0.0 (0.0, 1.3)**     | 0.0 (0.0, 0.0)**                   |
| Ishak score, n (%)      |                      |                      |                                    |
| 1                       | 0 (0.0)              | 1 (6.3)              | 0 (0.0)                            |
| 2                       | 3 (18.8)             | 0 (0.0)              | 4 (18.2)                           |
| 3                       | 7 (43.8)             | 7 (43.8)             | 1 (4.5)                            |
| 4                       | 4 (25.0)             | 3 (18.8)             | 8 (36.4)                           |
| 5                       | 1 (6.3)              | 5 (31.3)             | 8 (36.4)                           |
| 6                       | 1 (6.3)              | 0 (0.0)              | 1 (4.5)                            |
| PIR, n (%)              |                      |                      | **                                 |
| 0                       | 3 (18.8)             | 1 (6.3)              | 4 (18.2)                           |
| 1                       | 1 (6.3)              | 8 (50.0)             | 9 (40.9)                           |
| 2                       | 1 (6.3)              | 1 (6.3)              | 8 (36.4)                           |
| 3                       | 11 (68.8)            | 6 (37.5)             | 1 (4.5)                            |

**Note:** continuous variables were expressed as median (interquartile range, IQR) or mean ± standard deviation (SD). One-way ANOVA followed by Tukey's multiple comparisons test or Kruskal-Wallis test was used to assess changes among three groups. Categorical variables were presented as count (percentage) and compared by Chi-square trend test between any two groups. \* $p < 0.05$  and \*\* $p < 0.01$  (vs baseline) and <sup>###</sup> $p < 0.01$  (vs 78 weeks) were considered as statistically significant. **Abbreviations:** ALB, albumin; AFP, alpha fetoprotein; ALP, alkaline phosphatase; ALT, alanine transaminase; AST, aspartate aminotransferase; GGT, glutamyl transpeptidase; HBV, hepatitis B virus; LSM, liver stiffness measurement; M, male; PLT, platelet; PIR, progressive, indeterminate, and predominately regressive; TBIL, total bilirubin; WBC, white blood cell.

**Table S4. Clinical characteristics of regressive HBV-related liver fibrosis patients with three consecutive liver biopsies.**

|                         | Baseline (n=4)      | 78 weeks (n=4)    | 260 weeks (n=4)    |
|-------------------------|---------------------|-------------------|--------------------|
| Age, year               | 39.5±4.7            | -                 | -                  |
| Gender                  | M=2                 | -                 | -                  |
| WBC, 10 <sup>9</sup> /L | 4.9±0.5             | 3.7±1.3           | 5.3±0.2            |
| PLT, 10 <sup>9</sup> /L | 150.5±33.2          | 146.0±46.8        | 205.0±17.3         |
| ALT, U/L                | 112.0 (86.2, 335.0) | 21.0 (19.0, 22.8) | 15.0 (10.8, 19.3)* |
| AST, U/L                | 68.5 (55.0, 154.3)  | 23.3 (18.9, 25.8) | 16.0 (15.7, 16.5)* |
| ALP, U/L                | 81.5 (65.2, 98.0)   | 65.0 (64.5, 67.3) | 73.5 (66.5, 79.8)  |
| GGT, U/L                | 43.4 (36.5, 84.8)   | 25.5 (22.5, 27.3) | 18.0 (14.0, 23.5)* |
| ALB, g/L                | 42.1±5.0            | 39.3±4.7          | 46.2±2.9           |
| TBIL, µmol/L            | 20.4 (14.9, 25.3)   | 11.4 (6.5, 17.4)* | 15.2 (12.1, 19.4)  |
| AFP, ng/ml              | 7.5 (5.7, 21.9)     | 2.3 (1.6, 3.8)    | 1.9 (1.3, 2.7)*    |
| LSM, kPa                | 15.3±4.5            | 8.7±3.7           | 4.5±0.6*           |
| Log (HBV DNA)           | 5.8±2.2             | 0.0±0.0*          | 0.0±0.0*           |
| Ishak score, n (%)      |                     |                   |                    |
| 1                       | 0 (0.0)             | 0 (0.0)           | 0 (0.0)            |
| 2                       | 0 (0.0)             | 0 (0.0)           | 2 (50.0)           |
| 3                       | 2 (50.0)            | 3 (75.0)          | 0 (0.0)            |
| 4                       | 1 (25.0)            | 0 (0.0)           | 1 (25.0)           |
| 5                       | 0 (0.0)             | 1 (25.0)          | 1 (25.0)           |
| 6                       | 1 (25.0)            | 0 (0.0)           | 0 (0.0)            |
| PIR, n (%)              |                     | *                 | **                 |
| 0                       | 0 (0.0)             | 0 (0.0)           | 2 (50.0)           |
| 1                       | 0 (0.0)             | 3 (75.0)          | 2 (50.0)           |
| 2                       | 1 (25.0)            | 1 (25.0)          | 0 (0.0)            |
| 3                       | 3 (75.0)            | 0 (0.0)           | 0 (0.0)            |

**Note:** continuous variables were expressed as median (interquartile range, IQR) or mean ± standard deviation (SD). Matched one-way ANOVA test followed by Tukey's multiple comparisons test or Friedman test was used to assess the changes among the matched three groups. Categorical variables were presented as counts (percentages) and compared by Chi-square trend test between any two groups. \* $p < 0.05$  and \*\* $p < 0.01$  (vs 0 weeks) were considered as statistically significant. **Abbreviations:** ALB, albumin; AFP, alpha fetoprotein; ALP, alkaline phosphatase; ALT, alanine transaminase; AST, aspartate aminotransferase; GGT, glutamyl transpeptidase; HBV, hepatitis B virus; LSM, liver stiffness measurement; M, male; PLT, platelet; PIR, progressive, indeterminate, and predominately regressive; TBIL, total bilirubin; WBC, white blood cell.

**Table S5. Clinical characteristics of non-regressive HBV-related liver fibrosis patients with three consecutive liver biopsies.**

|                         | Baseline (n=6)      | 78 weeks (n=6)    | 260 weeks (n=6)                |
|-------------------------|---------------------|-------------------|--------------------------------|
| Age, year               | 46.5±10.9           | -                 | -                              |
| Gender                  | M=5                 | -                 | -                              |
| WBC, 10 <sup>9</sup> /L | 5.3±1.1             | 4.0±0.8           | 5.7±1.4                        |
| PLT, 10 <sup>9</sup> /L | 154.2±22.1          | 119.8±33.1        | 169.5±22.6                     |
| ALT, U/L                | 55.5 (42.8, 57.0)   | 33.0 (30.0, 59.3) | 23.5 (17.3, 31.3)              |
| AST, U/L                | 37.5 (36.3, 41.8)   | 31.3 (28.4, 46.5) | 23.9 (23.2, 27.0)              |
| ALP, U/L                | 103.5 (75.0, 114.8) | 78.5 (67.5, 89.5) | 83.5 (78.8, 101.0)             |
| GGT, U/L                | 28.0 (18.8, 29.8)   | 28.5 (27.3, 45.5) | 19.5 (14.3, 21.8)              |
| ALB, g/L                | 40.7±4.5            | 42.0±3.5          | 48.6±2.8 <sup>#</sup>          |
| TBIL, µmol/L            | 14.4 (11.4, 22.3)   | 13.9 (12.3, 16.1) | 18.1 (16.9, 25.8) <sup>*</sup> |
| AFP, ng/ml              | 13.2 (5.6, 15.9)    | 5.3 (3.2, 9.9)    | 3.7 (2.4, 7.2)                 |
| LSM, kPa                | 13.3±4.9            | 9.8±4.9           | 5.2±1.9 <sup>**</sup>          |
| Log (HBV DNA)           | 6.9 (6.3, 7.4)      | 0.0 (0.0, 1.2)    | 0.0 (0.0, 0.0) <sup>*</sup>    |
| Ishak score, n (%)      |                     |                   |                                |
| 1                       | 0 (0.0)             | 1 (16.7)          | 0 (0.0)                        |
| 2                       | 1 (16.7)            | 0 (0.0)           | 1 (16.7)                       |
| 3                       | 2 (33.3)            | 2 (33.3)          | 0 (0.0)                        |
| 4                       | 2 (33.3)            | 1 (16.7)          | 1 (16.7)                       |
| 5                       | 1 (16.7)            | 2 (33.3)          | 4 (66.6)                       |
| 6                       | 0 (0.0)             | 0 (0.0)           | 0 (0.0)                        |
| PIR, n (%)              |                     |                   |                                |
| 0                       | 1 (16.7)            | 1 (16.7)          | 1 (16.7)                       |
| 1                       | 1 (16.7)            | 1 (16.7)          | 2 (33.3)                       |
| 2                       | 0 (25.0)            | 0 (25.0)          | 3 (50.0)                       |
| 3                       | 4 (66.6)            | 4 (66.6)          | 0 (0.0)                        |

**Note:** continuous variables were expressed as median (interquartile range, IQR) or mean ± standard deviation (SD). Matched one-way ANOVA test followed by Tukey's multiple comparisons test or Friedman test was used to assess the changes among the matched three groups. Categorical variables were presented as counts (percentages) and compared by Chi-square trend test between any two groups. <sup>\*</sup> $p < 0.05$  and <sup>\*\*</sup> $p < 0.01$  (vs 0 weeks) and <sup>#</sup> $p < 0.05$  (vs 78 weeks) were considered as statistically significant. **Abbreviations:** ALB, albumin; AFP, alpha fetoprotein; ALP, alkaline phosphatase; ALT, alanine transaminase; AST, aspartate aminotransferase; GGT, glutamyl transpeptidase; HBV, hepatitis B virus; LSM, liver stiffness measurement; M, male; PLT, platelet; PIR, progressive, indeterminate, and predominately regressive; TBIL, total bilirubin; WBC, white blood cell.

**Table S6. Liver fibrosis-related matrisome genes (LFMGs).**

| <b>Gene symbol</b> | <b>Entrez ID</b> | <b>Description</b>                                         | <b>Matrisome category</b> |
|--------------------|------------------|------------------------------------------------------------|---------------------------|
| <i>COL5A1</i> ↑    | 1289             | Collagen, type V, alpha 1                                  | Collagens                 |
| <i>COL4A2</i> ↑    | 1284             | Collagen, type IV, alpha 2                                 | Collagens                 |
| <i>COL3A1</i> ↑    | 1281             | Collagen, type III, alpha 1                                | Collagens                 |
| <i>COL1A1</i> ↑    | 1277             | Collagen, type I, alpha 1                                  | Collagens                 |
| <i>COL1A2</i> ↑    | 1278             | Collagen, type I, alpha 2                                  | Collagens                 |
| <i>COL4A1</i> ↑    | 1282             | Collagen, type IV, alpha 1                                 | Collagens                 |
| <i>LTBP2</i> ↑     | 4053             | Latent transforming growth factor beta binding protein 2   | ECM Glycoproteins         |
| <i>LAMC3</i> ↑     | 10319            | Laminin, gamma 3                                           | ECM Glycoproteins         |
| <i>CTGF</i> ↑      | 1490             | Connective tissue growth factor                            | ECM Glycoproteins         |
| <i>MFAP4</i> ↑     | 4239             | Microfibrillar-associated protein 4                        | ECM Glycoproteins         |
| <i>SPP1</i> ↑      | 6696             | Secreted phosphoprotein 1                                  | ECM Glycoproteins         |
| <i>IGFBP7</i> ↑    | 3490             | Insulin-like growth factor binding protein 7               | ECM Glycoproteins         |
| <i>THBS1</i> ↑     | 7057             | Thrombospondin 1                                           | ECM Glycoproteins         |
| <i>FBLN5</i> ↑     | 10516            | Fibulin 5                                                  | ECM Glycoproteins         |
| <i>DPT</i> ↑       | 1805             | Dermatopontin                                              | ECM Glycoproteins         |
| <i>AEBP1</i> ↑     | 165              | AE binding protein 1                                       | ECM Glycoproteins         |
| <i>MGP</i> ↑       | 4256             | Matrix Gla protein                                         | ECM Glycoproteins         |
| <i>THBS2</i> ↑     | 7058             | Thrombospondin 2                                           | ECM Glycoproteins         |
| <i>EFEMP1</i> ↑    | 2202             | EGF-containing fibulin-like extracellular matrix protein 1 | ECM Glycoproteins         |
| <i>PCOLCE2</i> ↓   | 26577            | Procollagen C-endopeptidase enhancer 2                     | ECM Glycoproteins         |
| <i>LOXL4</i> ↑     | 84171            | Lysyl oxidase-like 4                                       | ECM Regulators            |
| <i>MMP2</i> ↑      | 4313             | Matrix metalloproteinase 2                                 | ECM Regulators            |
| <i>MMP7</i> ↑      | 4316             | Matrix metalloproteinase 7                                 | ECM Regulators            |
| <i>TIMP1</i> ↑     | 7076             | TIMP metalloproteinase inhibitor 1                         | ECM Regulators            |
| <i>ANXA2</i> ↑     | 302              | Annexin A2                                                 | ECM-affiliated Proteins   |
| <i>LGALS3</i> ↑    | 3958             | Lectin, galactoside-binding, soluble, 3                    | ECM-affiliated Proteins   |
| <i>CLEC4M</i> ↓    | 10332            | C-type lectin domain family 4, member M                    | ECM-affiliated Proteins   |
| <i>VCAN</i> ↑      | 1462             | Versican                                                   | Proteoglycans             |
| <i>LUM</i> ↑       | 4060             | Lumican                                                    | Proteoglycans             |
| <i>S100A6</i> ↑    | 6277             | S100 calcium binding protein A6                            | Secreted Factors          |
| <i>PDGFD</i> ↑     | 80310            | Platelet derived growth factor D                           | Secreted Factors          |
| <i>CCL19</i> ↑     | 6363             | Chemokine (C-C motif) ligand 19                            | Secreted Factors          |
| <i>CXCL10</i> ↑    | 3627             | Chemokine (C-X-C motif) ligand 10                          | Secreted Factors          |

---

|                |      |                                  |                  |
|----------------|------|----------------------------------|------------------|
| <b>CCL20</b> ↑ | 6364 | Chemokine (C-C motif) ligand 20  | Secreted Factors |
| <b>CXCL6</b> ↑ | 6372 | Chemokine (C-X-C motif) ligand 6 | Secreted Factors |

**Note:** upward arrow indicates upregulation; downward arrow indicates downregulation.

**Table S7. Clinical characteristics of LFMG<sup>Low</sup> and LFMG<sup>High</sup> patients at baseline.**

|                              | LFMG <sup>Low</sup> (n=11) | LFMG <sup>High</sup> (n=5) | P value |
|------------------------------|----------------------------|----------------------------|---------|
| <b>Age, year</b>             | 43.8±11.1                  | 44±9.9                     | 0.975   |
| <b>Gender</b>                | M=8                        | M=3                        | 0.999   |
| <b>WBC, 10<sup>9</sup>/L</b> | 176.1±57.7                 | 148.8±24.4                 | 0.368   |
| <b>PLT, 10<sup>9</sup>/L</b> | 154.2±22.1                 | 119.8±33.1                 | 0.336   |
| <b>ALT, U/L</b>              | 57.0 (316.0, 29.0)         | 84.0 (971.0, 39.0)         | 0.807   |
| <b>AST, U/L</b>              | 50.0 (228.0, 27.0)         | 37.0 (395.0, 30.8)         | 0.913   |
| <b>ALP, U/L</b>              | 75.7±16.8                  | 99.6±24.6                  | 0.038*  |
| <b>GGT, U/L</b>              | 27.0 (78.0, 15.0)          | 45.0 (204.0, 30.0)         | 0.084   |
| <b>ALB, g/L</b>              | 42.2±3.9                   | 39.8±5.7                   | 0.331   |
| <b>TBIL, µmol/L</b>          | 17.2±6.8                   | 17.6±7.5                   | 0.923   |
| <b>AFP, ng/ml</b>            | 5.4 (49.1, 2.8)            | 11.4 (59.8, 5.8)           | 0.320   |
| <b>Log (HBV DNA)</b>         | 7.4 (8.2, 5.7)             | 7.2 (8.2, 3.9)             | 0.339   |

**Note:** continuous variables were expressed as median (interquartile range, IQR) or mean ± standard deviation (SD). Categorical variables were presented as counts (percentages) and compared by Chi-square test. \* $p < 0.05$  was considered as statistically significant. **Abbreviations:** ALB, albumin; AFP, alpha fetoprotein; ALP, alkaline phosphatase; ALT, alanine transaminase; AST, aspartate aminotransferase; GGT, glutamyl transpeptidase; HBV, hepatitis B virus; M, male; PLT, platelet; TBIL, total bilirubin; WBC, white blood cell.

**Table S8. Clinical characteristics of LFMG<sup>Low</sup> and LFMG<sup>High</sup> patients after 78 weeks of treatment.**

|                         | LFMG <sup>Low</sup> (n=11) | LFMG <sup>High</sup> (n=5) | P value |
|-------------------------|----------------------------|----------------------------|---------|
| Age, year               | 41.1±10.0                  | 45.6±11.3                  | 0.436   |
| Gender                  | M=10                       | M=3                        | 0.214   |
| WBC, 10 <sup>9</sup> /L | 4.0±1.0                    | 4.2±1.4                    | 0.739   |
| PLT, 10 <sup>9</sup> /L | 124.0±41.8                 | 166.6±65.9                 | 0.135   |
| ALT, U/L                | 28.0 (36.0, 18.0)          | 30.0 (73.0, 13.0)          | 0.251   |
| AST, U/L                | 25.7 (33.0, 17.0)          | 27.0 (89.0, 13.0)          | 0.334   |
| ALP, U/L                | 74.4±11.2                  | 73.8±22.9                  | 0.947   |
| GGT, U/L                | 28.0 (31.0, 16.0)          | 36.0 (215.0, 15.0)         | 0.562   |
| ALB, g/L                | 43.5±3.6                   | 41.0±5.6                   | 0.303   |
| TBIL, µmol/L            | 14.2±4.2                   | 12.6±4.9                   | 0.531   |
| AFP, ng/ml              | 4.6±2.9                    | 5.0±4.0                    | 0.812   |
| Log (HBV DNA)           | 0.0 (1.6, 0.0)             | 0.0 (2.4, 0.0)             | 0.358   |

**Note:** continuous variables were expressed as median (interquartile range, IQR) or mean ± standard deviation (SD). Categorical variables were presented as counts (percentages) and compared by Chi-square test. **Abbreviations:** ALB, albumin; AFP, alpha fetoprotein; ALP, alkaline phosphatase; ALT, alanine transaminase; AST, aspartate aminotransferase; GGT, glutamyl transpeptidase; HBV, hepatitis B virus; M, male; PLT, platelet; TBIL, total bilirubin; WBC, white blood cell.



**Table S9. Clinical characteristics of LFMG<sup>Low</sup> and LFMG<sup>High</sup> patients after 260 weeks of treatment.**

|                         | LFMG <sup>Low</sup> (n=18) | LFMG <sup>High</sup> (n=4) | P value |
|-------------------------|----------------------------|----------------------------|---------|
| Age, year               | 45.7±9.5                   | 45.5±5.7                   | 0.965   |
| Gender                  | M=11                       | M=4                        | 0.263   |
| WBC, 10 <sup>9</sup> /L | 5.3±1.7                    | 5.7±1.3                    | 0.992   |
| PLT, 10 <sup>9</sup> /L | 179.0±56.4                 | 160.0±35.9                 | 0.222   |
| ALT, U/L                | 19.8±4.9                   | 29.8±10.7                  | 0.047*  |
| AST, U/L                | 22.7±4.5                   | 26.0±8.3                   | 0.069   |
| ALP, U/L                | 74.8±30.2                  | 97.0±26.1                  | 0.080   |
| GGT, U/L                | 20.0 (89.0, 10.0)          | 107.5 (183.0, 18.0)        | 0.041*  |
| ALB, g/L                | 42.5±3.1                   | 46.0±4.3                   | 0.838   |
| TBIL, µmol/L            | 12.2±2.9                   | 17.6±1.7                   | 0.902   |
| AFP, ng/ml              | 2.7±0.9                    | 5.4±3.4                    | 0.058   |
| Log (HBV DNA)           | 0.0 (0.0, 0.0)             | 0.0 (0.0, 0.0)             | 0.999   |

**Note:** continuous variables were expressed as median (interquartile range, IQR) or mean ± standard deviation (SD). Categorical variables were presented as counts (percentages) and compared by Chi-square test. \* $p < 0.05$  was considered as statistically significant. **Abbreviations:** ALB, albumin; AFP, alpha fetoprotein; ALP, alkaline phosphatase; ALT, alanine transaminase; AST, aspartate aminotransferase; GGT, glutamyl transpeptidase; HBV, hepatitis B virus; M, male; PLT, platelet; TBIL, total bilirubin; WBC, white blood cell.

Table S10. Marker genes for preliminary cell clustering and re-clustering in the scRNA-seq analysis.

| Cell clusters                    | Marker genes  |               |               |               |               |               |               |               |               |               |  |
|----------------------------------|---------------|---------------|---------------|---------------|---------------|---------------|---------------|---------------|---------------|---------------|--|
| T cells                          | <i>Cd3d</i>   |               |               |               |               |               |               |               |               |               |  |
| B cells                          | <i>Cd79a</i>  |               | <i>Ms4a1</i>  |               |               |               |               |               |               |               |  |
| Kupffer cells                    | <i>Cd163</i>  | <i>Cd68</i>   | <i>Marco</i>  | <i>C1qa</i>   | <i>Adgre1</i> | <i>Mrc1</i>   |               |               |               |               |  |
| Monocytes                        | <i>Mmp9</i>   | <i>Lcn2</i>   | <i>Ngp</i>    |               |               |               |               |               |               |               |  |
| HSCs                             | <i>Pdgfrb</i> | <i>Pdgfra</i> | <i>Dcn</i>    | <i>Acta2</i>  | <i>Col3a1</i> |               |               |               |               |               |  |
| ECs                              | <i>Vwf</i>    | <i>Pecam1</i> | <i>Cdh5</i>   | <i>Icam2</i>  |               |               |               |               |               |               |  |
| DCs                              | <i>Flt3</i>   | <i>Cd209a</i> | <i>Cst3</i>   |               |               |               |               |               |               |               |  |
| Chil3 <sup>+</sup> Macs          | <i>Lyz2</i>   | <i>Chil3</i>  | <i>Ms4a6c</i> |               |               |               |               |               |               |               |  |
| Fn1 <sup>+</sup> Macrophages     | <i>Fn1</i>    | <i>Arg1</i>   | <i>Ccl6</i>   |               |               |               |               |               |               |               |  |
| Cholangiocytes                   | <i>Ankrd1</i> | <i>Anxa5</i>  | <i>Atp1b1</i> | <i>Tm4sf4</i> | <i>Anxa4</i>  |               |               |               |               |               |  |
| Hepatocytes                      | <i>Apoa1</i>  | <i>Fabp1</i>  | <i>Rbp4</i>   | <i>Mup20</i>  | <i>Hamp</i>   |               |               |               |               |               |  |
| Cd163 <sup>+</sup> Kupffer cells | <i>Cd163</i>  | <i>Marco</i>  | <i>C1qa</i>   | <i>C1qc</i>   | <i>Clec4f</i> | <i>Timd4</i>  |               |               |               |               |  |
| MHC Kupffer cells                | <i>H2-Aa</i>  | <i>H2-Ab1</i> | <i>Rgs1</i>   |               |               |               |               |               |               |               |  |
| Fn1 <sup>+</sup> Macrophages     | <i>Fn1</i>    | <i>Arg1</i>   | <i>Ccl6</i>   |               |               |               |               |               |               |               |  |
| Chil3 <sup>+</sup> Macrophages   | <i>Lyz2</i>   | <i>Chil3</i>  | <i>Ms4a6c</i> | <i>Ly6c2</i>  | <i>F13a1</i>  | <i>Ifitm6</i> | <i>S100a4</i> | <i>Hp</i>     |               |               |  |
| Eno3 <sup>+</sup> Macrophages    | <i>Eno3</i>   | <i>Dusp16</i> | <i>Ear2</i>   | <i>Spn</i>    | <i>Gngt2</i>  | <i>Ace</i>    | <i>Hes1</i>   |               |               |               |  |
| Cd63 <sup>+</sup> Macrophages    | <i>Cd63</i>   | <i>Fabp5</i>  | <i>Ms4a7</i>  |               |               |               |               |               |               |               |  |
| Vein ECs                         | <i>Pecam1</i> | <i>Vwf</i>    | <i>Bgn</i>    | <i>Cyt11</i>  | <i>Cpe</i>    | <i>Wnt9b</i>  | <i>Thbd</i>   | <i>Ramp3</i>  | <i>Jpt1</i>   | <i>Entpd1</i> |  |
| Artery ECs                       | <i>Dll4</i>   | <i>Efnb2</i>  | <i>Plac8</i>  | <i>Bmx</i>    | <i>Sdc1</i>   | <i>Adgrg6</i> | <i>Cavin3</i> | <i>Nrg1</i>   | <i>Lmo7</i>   |               |  |
| Lymphatic ECs                    | <i>Meox1</i>  | <i>Tbx1</i>   | <i>Dtx1</i>   | <i>Prox1</i>  | <i>Pdpn</i>   | <i>Mmm1</i>   | <i>Fxyd6</i>  | <i>Fabp4</i>  | <i>Ccl21a</i> | <i>Gng11</i>  |  |
| LSEC1                            | <i>Msr1</i>   | <i>Ntn4</i>   | <i>Acer2</i>  | <i>Adam23</i> | <i>Ltbp4</i>  | <i>Itga9</i>  | <i>Cd36</i>   | <i>Glul</i>   |               |               |  |
| LSEC2                            | <i>Lyve1</i>  | <i>Cyp4b1</i> | <i>Ctsl</i>   | <i>Aass</i>   | <i>Bok</i>    | <i>Flt4</i>   | <i>Ccnd1</i>  | <i>Clec1b</i> |               |               |  |
| LSEC3                            | <i>Wnt2</i>   | <i>Kit</i>    | <i>Lgals1</i> | <i>Plpp1</i>  | <i>Gatm</i>   | <i>Plxnc1</i> | <i>Rab3b</i>  | <i>Gas6</i>   |               |               |  |

|                                 |                |                |                 |              |                |               |                |               |                |               |              |
|---------------------------------|----------------|----------------|-----------------|--------------|----------------|---------------|----------------|---------------|----------------|---------------|--------------|
| <b>Lrrn3<sup>+</sup> qHSCs</b>  | <i>Gem</i>     | <i>Dcn</i>     | <i>Rspo3</i>    | <i>Tgfbi</i> | <i>Reln</i>    | <i>Lrrn3</i>  | <i>Rgs5</i>    | <i>Ecm1</i>   | <i>Abcc9</i>   | <i>Tmem56</i> | <i>Fcna</i>  |
| <b>Ccl2<sup>+</sup> qHSCs</b>   | <i>Lsamp</i>   | <i>Rgs4</i>    | <i>Gcgr</i>     | <i>Ccl2</i>  | <i>Clstn2</i>  | <i>Nmnat2</i> | <i>Vtn</i>     | <i>Disp2</i>  |                |               |              |
| <b>Acta2<sup>+</sup> aHSCs</b>  | <i>Acta2</i>   | <i>Col3a1</i>  | <i>Tnc</i>      | <i>Timp1</i> | <i>Col15a1</i> | <i>S100a6</i> | <i>Tagln</i>   | <i>Lgals1</i> | <i>Cxcl14</i>  |               |              |
| <b>Col27a1<sup>+</sup> aHSC</b> | <i>Col27a1</i> | <i>Plekha6</i> | <i>Sned1</i>    | <i>Plce1</i> | <i>Tnxb</i>    | <i>Slc6a7</i> | <i>Fam184a</i> | <i>Coro6</i>  | <i>Cyp46a1</i> | <i>Hoxd4</i>  | <i>Tnnt3</i> |
| <b>Mfap4<sup>+</sup> aHSCs</b>  | <i>Igfbp4</i>  | <i>Mfap4</i>   | <i>Serpinf1</i> | <i>Lgi2</i>  | <i>Dpep1</i>   | <i>Fgl2</i>   | <i>Fxyd6</i>   | <i>Fndc5</i>  | <i>Gpx3</i>    | <i>Gxylt2</i> |              |
